# Supplementary material for: Determining the minimal important differences in the International Prostate Symptom Score and Overactive Bladder Questionnaire: results from an observational cohort study in Dutch primary care
Source: PubMed Central journal article supplement (PMC7008409; doi:10.1136/bmjopen-2019-032795), 2019-12-23
Supplement: bmjopen-2019-032795.draft_revisions.pdf [file bmjopen-2019-032795.draft_revisions.pdf]

# BMJ Open

BMJ Open is committed to open peer review. As part of this commitment we make the peer review history of every article we publish publicly available.

When an article is published we post the peer reviewers' comments and the authors' responses online. We also post the versions of the paper that were used during peer review. These are the versions that the peer review comments apply to.

The versions of the paper that follow are the versions that were submitted during the peer review process. They are not the versions of record or the final published versions. They should not be cited or distributed as the published version of this manuscript.

BMJ Open is an open access journal and the full, final, typeset and author-corrected version of record of the manuscript is available on our site with no access controls, subscription charges or pay-per-view fees (<http://bmjopen.bmj.com>).

If you have any questions on BMJ Open's open peer review process please email [info.bmjopen@bmj.com](mailto:info.bmjopen@bmj.com)

# BMJ Open

## Minimal important differences in the International Prostate Symptom Score and Overactive Bladder Questionnaire in a primary care population

|                               |                                                                                                                                                                                                                                                                                                                                                                                                                                                                                                                                                                                                                                                                                                                                                                                                                                                          |
|-------------------------------|----------------------------------------------------------------------------------------------------------------------------------------------------------------------------------------------------------------------------------------------------------------------------------------------------------------------------------------------------------------------------------------------------------------------------------------------------------------------------------------------------------------------------------------------------------------------------------------------------------------------------------------------------------------------------------------------------------------------------------------------------------------------------------------------------------------------------------------------------------|
| Journal:                      | <i>BMJ Open</i>                                                                                                                                                                                                                                                                                                                                                                                                                                                                                                                                                                                                                                                                                                                                                                                                                                          |
| Manuscript ID                 | bmjopen-2019-032795                                                                                                                                                                                                                                                                                                                                                                                                                                                                                                                                                                                                                                                                                                                                                                                                                                      |
| Article Type:                 | Research                                                                                                                                                                                                                                                                                                                                                                                                                                                                                                                                                                                                                                                                                                                                                                                                                                                 |
| Date Submitted by the Author: | 06-Jul-2019                                                                                                                                                                                                                                                                                                                                                                                                                                                                                                                                                                                                                                                                                                                                                                                                                                              |
| Complete List of Authors:     | Blanker, Marco; University of Groningen, University Medical Center Groningen, department of General Practice and Elderly Care Medicine<br>Alma, Harma; University of Groningen, University Medical Center Groningen, Department of General Practice and Elderly Care Medicine;<br>University of Groningen, University Medical Center Groningen, Groningen Research Institute for Asthma and COPD (GRIAC)<br>Devji, Tahira; McMaster University Faculty of Health Sciences, Clinical Epidemiology and Biostatistics<br>Roelofs, Marjan; University of Groningen, University Medical Center Groningen, department of General Practice and Elderly Care Medicine<br>Steffens, Martijn ; Isala Hospitals, urology<br>van der Worp, Henk; University of Groningen, University medical center groningen, Department General Practice and Elderly Care Medicine |
| Keywords:                     | Lower Urinary Tract Symptoms, Adrenergic alpha-Antagonists, Primary Health Care, Minimal Clinically Important Difference, Patient outcome assessment                                                                                                                                                                                                                                                                                                                                                                                                                                                                                                                                                                                                                                                                                                     |
|                               |                                                                                                                                                                                                                                                                                                                                                                                                                                                                                                                                                                                                                                                                                                                                                                                                                                                          |

SCHOLARONE™  
Manuscripts

## Minimal important differences in the International Prostate Symptom Score and Overactive Bladder Questionnaire in a primary care population

M.H. (Marco) Blanker<sup>1</sup>, H.J. (Harma) Alma<sup>1</sup>, T. (Tahira) Devji<sup>2</sup>, M. (Marjan) Roelofs<sup>1</sup>, M.G. (Martijn) Steffens<sup>3</sup>, H. (Henk) van der Worp<sup>1</sup>

1. Department of General Practice and Elderly Care Medicine, University Medical Centre Groningen, University of Groningen
2. Department of Health Research Methods, Evidence and Impact, McMaster University, Canada
3. Department of Urology, Isala Clinics, Zwolle, The Netherlands

Corresponding author: Marco H. Blanker, MD PhD, general practitioner and epidemiologist, Department of General Practice and Elderly Care Medicine, University Medical Centre Groningen, University of Groningen, P.O. box 196, 9700 AD Groningen, The Netherlands, Phone: +31 6 14961542, Fax: +31 50 3632964

E-mail addresses: [m.h.blanker@umcg.nl](mailto:m.h.blanker@umcg.nl), [h.j.alma@umcg.nl](mailto:h.j.alma@umcg.nl), [devjits@mcmaster.ca](mailto:devjits@mcmaster.ca), [marjanroelofs@hotmail.com](mailto:marjanroelofs@hotmail.com), [m.steffens@isala.nl](mailto:m.steffens@isala.nl), [h.van.der.worp@umcg.nl](mailto:h.van.der.worp@umcg.nl)

**Wordcount:** 2,939

**Keywords:** Lower Urinary Tract Symptoms; Adrenergic alpha-Antagonists; Primary Health Care; Minimal Clinically Important Difference; Patient outcome assessment

## ABSTRACT

**Objectives:** To determine the minimal important difference (MID) of the International Prostate Symptom Score (IPSS) and the Overactive Bladder Questionnaire short form (OAB-q SF) assessed in primary care among patients treated for LUTS.

**Design:** Single-arm, open-label observational cohort study with a 6-week follow-up.

**Setting:** Twenty-two pharmacies in the Netherlands.

**Participants:** We enrolled Dutch men with uncomplicated LUTS who received a new alpha-blocker prescription from their general practitioner or urologist.

**Primary and secondary outcomes:** The IPSS and OAB-q SF were completed before and after 6 weeks of therapy. At 6 weeks, men also completed the Perceived Global Impression of Improvement (PGI-I). The mean change scores of the IPSS and OAB-q SF were calculated for each PGI-I outcome category, with the category 'a little better' used to determine the MID. The standard error of measurement (SEM) was calculated for each questionnaire.

**Results:** In total, 165 men completed follow-up. The MID was 5.2 points (95%CI, 3.9–6.4; SEM 3.6) for the IPSS and 11.0 points (95%CI, 7.1–14.9; SEM 9.7) for the OAB-q SF. However, the MID for the IPSS was higher in men with severe baseline symptoms (7.1; 95%CI, 5.3–9.0) than in men with moderate baseline symptoms (3.2; 95%CI, 1.7–4.8).

**Conclusion:** In this study, the MID for the IPSS was considerably higher than the MID of 3.1 reported in the only other study on this topic, but may be due to methodological differences. Interpretation of the MID for the OAB-q SF is hampered by the overlap with the SEM. Future studies are needed to confirm our results because correlations between the PGI-I and symptom questionnaires were suboptimal.

## ARTICLE SUMMARY

### Strengths and limitations of this study:

- We assessed the minimal important difference (MID) of two frequently used questionnaires on lower urinary tract symptoms.

- 1  
2  
3  
4  
5  
6  
7  
8  
9  
10  
11  
12  
13  
14  
15
- Given that many men are treated in primary care, MID values for this setting are particularly important to inform evidence-based decision-making and to facilitate interpretation of the IPSS and OAB-q SF.
  - Notably, the sample size of this study was small, which resulted in very low numbers of men being included in the PGI-I category 'very much better' or 'worsening of symptoms'.

16  
17  
18  
19  
20  
21  
22  
23  
24

**Funding statement:** This work was supported by The Hein Hogerzeil Foundation with an unrestricted grant. The Foundation was not involved in the design of this study, nor in the data collection, data analyses, interpretation of the outcomes, or the writing of this manuscript.

25  
26  
27  
28  
29  
30  
31  
32  
33  
34  
35  
36  
37  
38  
39  
40  
41  
42  
43  
44  
45  
46  
47  
48  
49  
50  
51  
52  
53  
54  
55  
56  
57  
58  
59  
60

**Conflict of interest statement:** All authors have completed the ICMJE uniform disclosure form at [www.icmje.org/coi\\_disclosure.pdf](http://www.icmje.org/coi_disclosure.pdf) and declare: no support from any organisation for the submitted work; no financial relationships with any organisations that might have an interest in the submitted work in the previous three years; no other relationships or activities that could appear to have influenced the submitted work.

## INTRODUCTION

Symptom severity is a key outcome for patients with LUTS and is most often evaluated by direct patient inquiry, using patient-reported outcome measures (PROMs). Although the IPSS is most often used for this purpose in both clinical trials and practice,<sup>1-5</sup> it fails to capture problematic symptoms such as urinary incontinence and urgency. Therefore, the Overactive Bladder Questionnaire (OAB-q) is increasingly being used to evaluate the treatment of overactive bladder,<sup>6,7</sup> with the short form (i.e., OAB-q SF) having the advantage of being less time consuming.<sup>8</sup> Together, both of the IPSS and OAB-q SF capture the spectrum of outcomes that are important to patients, but it is difficult to interpret the effects of an intervention expressed as mean scores or change scores over time.

The minimal important difference (MID) has proven invaluable when interpreting PROMs and could be of great value for both the IPSS and OAB-q SF.<sup>9,10</sup> To date, the MID has only been reported for the IPSS in a study conducted in secondary care among participants of clinical trials.<sup>1,2</sup> There has been no report of the MID for the OAB-q SF in any care setting. In countries like the Netherlands and the United Kingdom, most men with LUTS first visit their GP to seek treatment. Given that setting may affect the MID, possibly because of differences in baseline symptom severity,<sup>9-11</sup> we feel that it is important to assess the MID in a primary care setting. Knowledge about the MID in primary care will then provide invaluable data for interpreting treatment outcomes that may differ between primary and secondary care. In addition, evidence must be obtained from multiple studies to ensure that MID determinations are accurate.

In the current study, we aimed to determine the MIDs for both the IPSS and OAB-q SF in a patient cohort originating mainly from primary care.

## METHODS

### Study design

We conducted a prospective cohort study between January 2016 and April 2018. Baseline data for the IPSS and OAB-q SF were compared with follow-up data after 6 weeks of treatment. At

1  
2  
3 follow-up, participants also completed the Perceived Global Impression of Improvement (PGI-I)  
4  
5 and we calculated the MID.

### 7 **Participants**

9 Adult men who visited a participating pharmacy in the north of the Netherlands were included  
10  
11 if they received a new alpha-blocker prescription for uncomplicated LUTS from a GP or  
12  
13 urologist. A prescription was defined as new if no alpha-blocker prescription had been given  
14  
15 within the past year. The pharmacists checked if the alpha-blocker was indicated for LUTS and  
16  
17 excluded men prescribed alpha-blockers for urinary tract stones or indwelling catheters. All  
18  
19 participants provided written informed consent. The medical ethics committee of the University  
20  
21 Medical Centre Groningen, the Netherlands, approved the study (number 2016.122).  
22  
23

### 24 **Data collection**

25  
26 At baseline, before starting alpha-blocker therapy, all participants provided relevant descriptive  
27  
28 data (e.g., age, duration of LUTS in months or years, and history of surgery for LUTS) and  
29  
30 completed the Dutch versions of the IPSS and OAB-q SF. After 6 weeks, men who consented  
31  
32 repeated the IPSS and OAB-q SF by postal invitation. At this time, we asked participants to  
33  
34 complete the Perceived Global Impression of Improvement (PGI-I) questionnaire.<sup>12</sup>  
35  
36

### 37 **Questionnaires**

38  
39 The IPSS contains seven questions and produces a total score that may range from 0 (no  
40  
41 symptoms) to 35 points (maximum score).<sup>1</sup> IPSS scores are often categorized as no/mild  
42  
43 symptoms (0–7 points), moderate symptoms (8–19 points), or severe symptoms ( $\geq 20$  points).  
44  
45 The MID for the IPSS is currently considered to be 3.1 points.<sup>2</sup> The OAB-q SF contains six  
46  
47 questions on 6-point Likert-type scales, with the outcomes transformed to a 0–100 point scale  
48  
49 in which higher scores indicate more severe symptoms.<sup>8</sup> The PGI-I is a validated generic tool for  
50  
51 assessing overall improvement after treatment and is answered on a 7-point Likert-type scale,  
52  
53 with the following options: 'very much better', 'much better', 'a little better', 'no change', 'a little  
54  
55 worse', 'much worse' or 'very much worse'. We sent a reminder after two weeks to patients who  
56  
57 did not respond to follow-up requests.  
58  
59  
60

## Data analyses

Baseline characteristics are reported as continuous variables and summarized as mean and sd or as median and interquartile range, depending on the distribution checked by the Shapiro–Wilk test. These characteristics were also compared between men with and without completed follow-up data to test for selective nonresponse. Next, the change scores of the IPSS and OAB-q SF were calculated by comparing the data between the baseline and follow-up questionnaires. Change scores were inverted to facilitate intuitive interpretation, with positive scores reflecting symptom improvement.

Various methods exist to determine the MID of questionnaires and are typically either anchor-based or distribution-based.<sup>9, 13-15</sup> The latter involve evaluating change in the PROM with the probability that the change occurred by chance, sample variation or measurement precision; however, they do not reflect patient perspectives.<sup>14, 16</sup> Thus, we used an anchor-based method,<sup>9</sup> in which we compared changes in the IPSS or OAB-q SF (PROM) with the PGI-I (the anchor). For each PGI-I category, we then present the mean change in scores from baseline to follow-up with the associated CIs. We defined the MID as the mean change in IPSS or OAB-q SF for the PGI-I category ‘a little better’, but still present the mean change scores for the other PGI-I categories.

The usefulness of anchor-based approaches depends on the relationship between the PROM and the anchor.<sup>17-19</sup> The anchor and PROM should be measuring the same or similar underlying constructs and should therefore be appreciably correlated. We therefore examined the Spearman correlation coefficients between the PGI-I and the IPSS and OAB-q SF for the baseline, follow-up and change data to ensure the anchor’s validity. A correlation coefficient between the symptom change scores and the PGI-I of  $\geq 0.50$ , and an equal and opposite correlation of the PGI-I with the baseline score and the follow-up score, were considered ideal and likely to yield trustworthy MID estimates.<sup>17-19</sup>

To test the impact of baseline symptom severity on the distribution of results, a stratified analysis was performed for the IPSS categories ‘moderate symptoms’ and ‘severe



1  
2  
3 symptoms' because previous research has shown that such stratification has a large impact.<sup>2</sup> No  
4 such categories have been defined for the OAB-q SF, so we did not perform a similar analysis for  
5 this questionnaire. Subgroup analyses were also performed with participants who received  
6 their prescription from their GP, allowing us to provide data that focused on the primary care  
7 setting. Finally, we checked if the MID exceeded the measurement error.<sup>15,17</sup> For this, we  
8 calculated the standard error of measurement (SEM) as follows:  $[sd \times (1 - reliability)^{1/2}]$ .  
9 Cronbach's alpha was used as the reliability measure.<sup>20</sup>

10  
11 The complete data set was used without imputing missing data. All analyses were  
12 performed using IBM SPSS version 25.0 (IBM Corp., Armonk, NY, USA), and we considered a p-  
13 value <0.05 to be statistically significant.

### 14 **Patient and public involvement**

15  
16 This study was performed without patient involvement. We did not invite patients to comment  
17 on the study design nor did we consult them to interpret the results. Patients were not invited  
18 to contribute to the writing or editing of this document for readability or accuracy.

## 19 **RESULTS**

20  
21 A total of 251 men completed the baseline questionnaires, of which 165 also completed the  
22 follow-up questionnaires. The baseline characteristics of men with and without follow-up data  
23 are shown in Table 1, with no statistically significant differences found between these groups.  
24 Notably, 86.3% of men received their prescription from a GP and the remainder received it from  
25 a urologist.

26  
27 There were mean improvements in the IPSS and OAB-q SF scores during the study of 5.8  
28 (sd 6.7) and 11.8 points (sd 17.4), respectively. Between baseline and follow-up at 6 weeks, the  
29 mean IPSS score changed from 19.1 (sd 6.8) to 13.3 (sd 6.5) and the mean OAB-q SF score  
30 changed from 39.7 (sd 19.2) to 27.9 (sd 16.9). The PGI-I outcomes are shown in Table 2 and  
31 indicate that most men reported that they were 'a little better' or 'much better' (74.7%), whilst  
32 only 23.5% perceived no change. Only three men (1.8%) reported 'worsened' symptoms, and  
33  
34  
35  
36  
37  
38  
39  
40  
41  
42  
43  
44  
45  
46  
47  
48  
49  
50  
51  
52  
53  
54  
55  
56  
57  
58  
59  
60

1  
2  
3 none of the participants reported 'much worsened' or 'very much worsened' symptoms.  
4

5 Table 2 also shows the distribution of changes in the IPSS and OAB-q SF for each PGI-I  
6 category. The MID for the IPSS was 5.2 points (95% CI, 3.9–6.4) and the PGI-I outcomes 'no  
7 change' and 'much better' corresponded to IPSS symptom changes of 3.1 points (95% CI, 1.1–  
8 5.1) and 8.7 points (95% CI, 6.8–10.7), respectively. The MID for the OAB-q SF was 11.0 points  
9 (95% CI, 7.1 to 14.9) and the PGI-I outcomes 'no change' and 'much better' corresponded with  
10 mean improvements of 3.0 points (95% CI, -2.3 to 8.4) and 19.1 points (95% CI, 14.3–24.0),  
11 respectively. The Spearman correlation coefficients were then calculated between the PGI-I and  
12 both the IPSS and the OAB-q SF. The correlation was -0.51 for the PGI-I and baseline IPSS, 0.43  
13 for the PGI-I and follow-up IPSS and 0.38 for the PGI-I and change in IPSS. The corresponding  
14 correlations for the OAB-q SF were -0.09 at baseline, 0.36 at follow-up and 0.42 for the change.  
15  
16  
17  
18  
19  
20  
21  
22  
23  
24  
25  
26

27 Subgroup analyses of data for men with a prescription from a GP found no relevant  
28 differences, with MID values of 5.4 for the IPSS and 11.2 for the OAB-q SF (Table 3). Stratified  
29 analysis of baseline data revealed that men with severe symptoms had higher MID values for  
30 the IPSS, reaching 7.1 (95% CI, 5.3–9.0), compared with the MID value of 3.2 (95% CI, 1.7–4.8)  
31 for men with moderate symptoms (Table 4).  
32  
33  
34  
35  
36

37 Finally, the SEM was 3.6 for the IPSS and 9.7 for the OAB-q SF.  
38  
39  
40  
41

## 42 **DISCUSSION**

43  
44 We estimated the MID for two questionnaires that are often used to assess male LUTS in  
45 primary care. However, whereas the SEM of the IPSS was less than the 95% CI of the MID (5.2  
46 points; 95% CI, 3.9–6.4; SEM 3.6), the SEM of the OAB-q SF fell within the 95% CI of the MID (11  
47 points; 95% CI, 7.1–14.9; SEM 9.7). Thus, we can only conclude that the outcomes for the IPSS  
48 were unlikely to have occurred because of chance or measurement imprecision. Given that  
49 many questionnaires have used multiple MID values, we were surprised to find only one  
50 previous estimate of the MID for the IPSS in the literature.<sup>1,2</sup> Our study therefore adds relevant  
51 information in the primary care setting for clinicians and guideline developers.  
52  
53  
54  
55  
56  
57  
58  
59  
60

1  
2  
3 Our results for the IPSS were different to those of the seminal study on this topic  
4 performed by Barry et al. in secondary care.<sup>1,2</sup> In that study, the MID of 3.1 points (sd 0.27) fell  
5 within the 95% CI of the 'no change' group, but outside the CI of the 'a little better' group,  
6 suggesting a likely underestimation of the real value. In the current study, there was also some  
7 overlap between the CIs of the 'no change' and the 'a little better' group, though this was within  
8 a change of only 3.9 to 5.1 points. Given that treatment is typically in primary care, we have  
9 therefore provided additional data that is applicable to most men with LUTS. Nevertheless, the  
10 differences in outcomes compared with the study by Barry et al. need to be explained. It is our  
11 contention that three methodological differences account for these differences.  
12  
13  
14  
15  
16  
17  
18  
19  
20  
21

22 First, Barry et al. compared patients between baseline and follow-up after 13 weeks. By  
23 contrast, the follow-up period in the current study was only 6 weeks. Although this difference of  
24 7 weeks may have affected the ability of patients to recall their prior health state accurately, the  
25 true impact of this remains unclear. Change scores may also have been influenced by the natural  
26 variation that occurs in symptom severity over time.  
27  
28  
29  
30  
31  
32

33 Second, in the research by Barry et al., a global assessment of patient improvement was  
34 used at baseline. This included a 5-point scale with the options 'marked improvement',  
35 'moderate improvement', 'slight improvement', 'no improvement', and 'worse' for which the  
36 exact question was not reported. In our study, we used a 7-point Likert-type scale that ranged  
37 from 'very much better' to 'very much worsened'. We considered that this difference probably  
38 had no more than a marginal impact given that the positive outcome categories were  
39 comparable in both studies. Notably, none of the participants in our study reported that the  
40 symptoms had 'very' or 'very much' worsened.  
41  
42  
43  
44  
45  
46  
47  
48  
49

50 Third, we mainly included men from primary care, rather than men solely from  
51 secondary care. Although it is generally thought that men in primary care have fewer symptoms,  
52 our men tended to have more severe symptoms (IPSS score >19) than in the study by Barry et  
53 al. (45% versus 25%). Barry et al. also reported that baseline severity had a major impact on the  
54 MID, but when we compare their stratified analysis with ours, we had higher mean change  
55  
56  
57  
58  
59  
60

1  
2  
3 scores for each PGI-I category. This might be explained by the fact that we only included men  
4 who actually used an alpha-blocker. In contrast to this focused approach, Barry et al. used data  
5 for all participants in a large, randomized, double-blind trial of four treatment strategies for  
6 male LUTS. In their study, a lower MID could therefore have resulted from the inclusion of  
7 patients receiving placebo, finasteride, terazosin or combination therapy given that the efficacy  
8 of alpha-blockers exceeds that of both placebo and finasteride. The use of blinding meant that  
9 men who used placebo or finasteride may have overestimated their subjective improvement,  
10 whilst alpha-blocker users may have underestimated their subjective improvement. Given that  
11 the IPSS objectively counts symptoms, the placebo and finasteride users would experience a  
12 smaller change in the IPSS whereas the active drug users would experience a larger effect.  
13 Although the actual impact of each intervention is unknown, researchers in other fields have  
14 made similar observations.<sup>10, 11, 21</sup>

15  
16 We were unable to find any prior estimates of the MID for the OAB-q SF in the literature.  
17 Our finding that 11.0 points (95% CI, 7.1–14.9) indicates a clinically relevant change is therefore  
18 a novel and important finding, but one for which the reliability will need to be assessed in other  
19 studies. We recognize that alpha-blockers are not specifically indicated for the treatment of  
20 overactive bladder, but we contend that there is a considerable overlap with LUTS unrelated to  
21 overactive bladder. Indeed, guidelines suggest prescribing alpha-blockers for most men with  
22 LUTS who request active treatment. This is because these agents have a rapid onset of action,  
23 good efficacy, and low rate and severity of adverse events.<sup>3-5</sup> We recommend further study to  
24 determine the MID in men with specific symptoms of overactive bladder treated with  
25 anticholinergics or beta-3 agonists.

26  
27 Some limitations need to be considered when assessing our results. Notably, the sample  
28 size of this study was small, which resulted in very low numbers of men being included in the  
29 PGI-I category 'very much better'. For that category, the mean change scores for both  
30 questionnaires showed very wide CIs. The same holds for the categories linked to symptom  
31 worsening. In those categories, a trial discontinuation may be more suitable for reliable

1  
2  
3 estimates. The sample size might also explain why the CI of the MID estimate for the OAB-q SF  
4 included the SEM.  
5  
6

7 Another limitation is reflected by difficulties we encountered with some of the  
8 associations between the PGI-I and the two PROM questionnaires. For the IPSS, the follow-up  
9 IPSS and PGI-I scores correlated better than with IPSS change and PGI-I scores, suggesting that  
10 this rating only reflected the current status, which in turn, decreases confidence in the MID  
11 estimate. For the OAB-q SF, the correlation coefficient between the baseline OAB-q SF and PGI-I  
12 scores was opposite in magnitude to that for the follow-up OAB-q SF and PGI-I scores. With both  
13 questionnaires, the correlation coefficients for the change scores were lower than the threshold  
14 of 0.5 that we set a priori.<sup>18</sup> High correlation coefficients are preferred between the anchor and  
15 the change in PROM, though some researchers have suggested applying lower thresholds.<sup>22</sup>  
16 Still, even the high correlation coefficients are insufficient to confirm that the transition rating is  
17 in fact measuring change as opposed to current health status.<sup>18</sup> Unfortunately, Barry et al. did  
18 not report the correlation coefficients between the IPSS and the anchor,<sup>2</sup> which is consistent  
19 with most other research for PROMs.<sup>23</sup> Given the suboptimal relationship between the PROM  
20 and the anchor, we must stress that the estimates obtained for the MID should be interpreted  
21 with caution and should be confirmed in future investigations with larger samples.  
22  
23  
24  
25  
26  
27  
28  
29  
30  
31  
32  
33  
34  
35  
36  
37  
38  
39

40 In conclusion, this study is the first to define MID values for two important PROMs used  
41 to evaluate the effectiveness of treatment for male LUTS in primary care. Given that many men  
42 are treated in primary care, MID values for this setting are particularly important to inform  
43 evidence-based decision-making and to facilitate interpretation of the IPSS and OAB-q SF.  
44 Moreover, we consider that this study emphasizes the importance of the MID to individual  
45 patients in daily practice. We defined the MID based on the PGI-I outcome 'a little better' in the  
46 present study, but patients may expect 'much better' as an outcome when starting therapy. To  
47 date, most outcomes of alpha-blocker and other drug treatments for male LUTS have been  
48 expressed as the mean IPSS change scores. In the vast majority of studies<sup>3</sup>, difference in IPSS  
49 changes between active treatment and placebo have approached, but not exceeded, the  
50  
51  
52  
53  
54  
55  
56  
57  
58  
59  
60

1  
2  
3 previously reported MID of 3.1.<sup>1,2</sup> Applying a threshold for improvement of 5.2 points, as  
4 described in our study, may change the interpretation of those studies.  
5  
6  
7  
8

### 9 **Acknowledgements**

10 We are grateful for the assistance of Tom Vermist in collecting the data. The authors thank all  
11 patients and collaborating pharmacies for their participation, as well as Dr Robert Sykes  
12 (www.doctored.org.uk) for providing editorial services.  
13  
14  
15  
16  
17

### 18 **Author contributions**

19 The corresponding author attests that all listed authors meet authorship criteria and that no  
20 others meeting the criteria have been omitted.  
21  
22  
23

24 MHB and MGS initiated the study. Acquisition of the data was done by MHB and MR. Analysis  
25 and interpretation of the data was done by MHB, HJA, TD and HW. MHB wrote the manuscript  
26 with extensive support from HJA and TD.  
27  
28  
29

30 All authors critically reviewed the manuscript.  
31  
32

### 33 **Data sharing statement**

34 Data collected for this study will be available from the corresponding author upon request.  
35  
36  
37  
38

### 39 **REFERENCES**

40  
41  
42 1 Barry MJ, Fowler FJ,Jr, O'Leary MP, et al. The American Urological Association symptom index  
43 for benign prostatic hyperplasia. The Measurement Committee of the American Urological  
44 Association. *J Urol* 1992;148:1549,57; discussion 1564.  
45  
46  
47

48 2 Barry MJ, Williford WO, Chang Y, et al. Benign prostatic hyperplasia specific health status  
49 measures in clinical research: how much change in the American Urological Association  
50 symptom index and the benign prostatic hyperplasia impact index is perceptible to patients?. *J*  
51 *Urol* 1995;154:1770-4.  
52  
53  
54

55 3 National Clinical Guideline Centre (NICE). Lower urinary tract symptoms in men: management  
56 (Clinical guideline CG97) 2015;CG97  
57 doi:<http://www.nice.org.uk/nicemedia/live/12984/48554/48554.pdf>.  
58  
59  
60

- 1  
2  
3 4 Gratzke C, Bachmann A, Descazeaud A, et al. EAU Guidelines on the Assessment of Non-  
4 neurogenic Male Lower Urinary Tract Symptoms including Benign Prostatic Obstruction. *Eur*  
5 *Urol* 2015;67:1099-109 doi:10.1016/j.eururo.2014.12.038 [doi].  
6  
7  
8  
9 5 Blanker MH, Klomp MA, van den Donk M, et al. Summary of the NHG practice guideline 'Lower  
10 urinary tract symptoms in men'. *Ned Tijdschr Geneeskd* 2013;157:A6178.  
11  
12  
13 6 Coyne K, Revicki D, Hunt T, et al. Psychometric validation of an overactive bladder symptom  
14 and health-related quality of life questionnaire: the OAB-q. *Qual Life Res* 2002;11:563-74.  
15  
16  
17 7 Coyne KS, Matza LS, Thompson CL. The responsiveness of the Overactive Bladder  
18 Questionnaire (OAB-q). *Qual Life Res* 2005;14:849-55.  
19  
20  
21  
22 8 Coyne KS, Thompson CL, Lai JS, et al. An overactive bladder symptom and health-related  
23 quality of life short-form: validation of the OAB-q SF. *Neurol Urodyn* 2015;34:255-63  
24 doi:10.1002/nau.22559 [doi].  
25  
26  
27  
28 9 Jaeschke R, Singer J, Guyatt GH. Measurement of health status. Ascertaining the minimal  
29 clinically important difference. *Control Clin Trials* 1989;10:407-15.  
30  
31  
32  
33 10 Terwee CB, Roorda LD, Dekker J, et al. Mind the MIC: large variation among populations and  
34 methods. *J Clin Epidemiol* 2010;63:524-34 doi:10.1016/j.jclinepi.2009.08.010 [doi].  
35  
36  
37 11 Olsen MF, Bjerre E, Hansen MD, et al. Minimum clinically important differences in chronic  
38 pain vary considerably by baseline pain and methodological factors: systematic review of  
39 empirical studies. *J Clin Epidemiol* 2018;101:87,106.e2 doi:S0895-4356(18)30124-0 [pii].  
40  
41  
42  
43 12 Viktrup L, Hayes RP, Wang P, et al. Construct validation of patient global impression of  
44 severity (PGI-S) and improvement (PGI-I) questionnaires in the treatment of men with lower  
45 urinary tract symptoms secondary to benign prostatic hyperplasia. *BMC Urol* 2012;12:30,2490-  
46 12-30 doi:10.1186/1471-2490-12-30 [doi].  
47  
48  
49  
50  
51 13 Angst F, Aeschlimann A, Angst J. The minimal clinically important difference raised the  
52 significance of outcome effects above the statistical level, with methodological implications for  
53 future studies. *J Clin Epidemiol* 2017;82:128-36 doi:S0895-4356(16)30776-4 [pii].  
54  
55  
56  
57 14 Crosby RD, Kolotkin RL, Williams GR. Defining clinically meaningful change in health-related  
58 quality of life. *J Clin Epidemiol* 2003;56:395-407 doi:S0895435603000441 [pii].  
59  
60

1  
2  
3 15 Norman GR, Sloan JA, Wyrwich KW. Interpretation of changes in health-related quality of life:  
4 the remarkable universality of half a standard deviation. *Med Care* 2003;41:582-92  
5 doi:10.1097/01.MLR.0000062554.74615.4C [doi].  
6  
7

8  
9 16 de Vet HC, Terwee CB. The minimal detectable change should not replace the minimal  
10 important difference. *J Clin Epidemiol* 2010;63:804,5; author reply 806  
11 doi:10.1016/j.jclinepi.2009.12.015 [doi].  
12  
13

14  
15 17 Cella D, Hahn EA, Dineen K. Meaningful change in cancer-specific quality of life scores:  
16 differences between improvement and worsening. *Qual Life Res* 2002;11:207-21.  
17  
18

19 18 Guyatt GH, Norman GR, Juniper EF, et al. A critical look at transition ratings. *J Clin Epidemiol*  
20 2002;55:900-8 doi:S0895435602004353 [pii].  
21  
22

23  
24 19 Guyatt GH, Jaeschke RJ. Reassessing quality-of-life instruments in the evaluation of new  
25 drugs. *Pharmacoeconomics* 1997;12:621-6 doi:10.2165/00019053-199712060-00002 [doi].  
26  
27

28 20 Wyrwich KW, Tierney WM, Wolinsky FD. Using the standard error of measurement to  
29 identify important changes on the Asthma Quality of Life Questionnaire. *Qual Life Res*  
30 2002;11:1-7.  
31  
32

33  
34 21 Devji T, Guyatt GH, Lytvyn L, et al. Application of minimal important differences in  
35 degenerative knee disease outcomes: a systematic review and case study to inform BMJ Rapid  
36 Recommendations. *BMJ Open* 2017;7:e015587,2016-015587 doi:10.1136/bmjopen-2016-  
37 015587 [doi].  
38  
39

40  
41 22 Revicki D, Hays RD, Cella D, et al. Recommended methods for determining responsiveness  
42 and minimally important differences for patient-reported outcomes. *J Clin Epidemiol*  
43 2008;61:102-9 doi:10.1016/j.jclinepi.2007.03.012 [doi].  
44  
45  
46

47  
48 23 Alma H, de Jong C, Tsiligianni I, et al. Clinically relevant differences in COPD health status:  
49 systematic review and triangulation. *Eur Respir J* 2018;52:1800412  
50 doi:10.1183/13993003.00412.  
51  
52  
53  
54  
55  
56  
57  
58  
59  
60



**Table 1.** Baseline characteristics of all participants and participants who dropped out after the baseline questionnaire

|                                           | Full participants<br>(n = 165) | Drop out after baseline<br>(n = 86) | p-value |
|-------------------------------------------|--------------------------------|-------------------------------------|---------|
| Age (mean ± sd)                           | 66.7±9.7                       | 65.4±12.1                           | 0.42*   |
| Prescription from GP (%)                  | 86.3                           | 83.2                                | 0.55#   |
| IPSS score (mean ± sd)                    | 19.1±6.8                       | 17.6±6.5                            | 0.11*   |
| IPSS categories (%)                       |                                |                                     | 0.12#   |
| - none/mild                               | 3.7                            | 6.4                                 |         |
| - moderate                                | 50.9                           | 61.5                                |         |
| - severe                                  | 45.3                           | 32.1                                |         |
| IPSS Quality of Life (median   IQR)       | 4.0   2.0                      | 4.0   2.0                           | 0.52§   |
| OAB-q SF (mean ± sd)                      | 39.8±19.2                      | 40.7±18.1                           | 0.70*   |
| Duration of LUTS in months (median   IQR) | 24.0   37                      | 12.0   33                           | 0.11§   |
| History of surgery for LUTS (%)           | 1.2                            | 3.8                                 | 0.19#   |

IQR: interquartile range. P-values refer to: \* student-t-test; # chi-squared test; § Mann-Whitney U test.

Abbreviations: OAB-q SF, Overactive Bladder Questionnaire short form.

**Table 2.** Change scores for the IPSS and OAB-q SF by PGI-I outcomes

| PGI-I outcome          | N (%)            | IPSS                 | Missing  | OAB-q SF               | Missing  |
|------------------------|------------------|----------------------|----------|------------------------|----------|
| Very much better       | 6 (3.6)          | 13.4 (2.9;23.9)      | 1        | 23.8 (2.3;45.3)        | 0        |
| Much better            | 50 (30.3)        | 8.7 (6.8;10.7)       | 2        | 19.1 (14.3;24.0)       | 3        |
| <b>A little better</b> | <b>68 (41.2)</b> | <b>5.2 (3.9;6.4)</b> | <b>3</b> | <b>11.0 (7.1;14.9)</b> | <b>4</b> |
| No change              | 38 (23.0)        | 3.1 (1.1;5.1)        | 0        | 3.0 (-2.3;8.4)         | 4        |
| A little worse         | 3 (1.8)          | -5.0 (-30.9;20.9)    | 0        | -9.7 (-81.7;62.4)      | 0        |

Change in IPSS and OAB-q SF scores were estimated by comparing symptom scores between baseline and 6 weeks. Mean change and 95% CIs are presented. Outcomes are inverted so that positive changes reflect symptom improvement. The PGI-I category 'a little better' reflects the MID for both questionnaires. None of the participants scored 'much worsened' or 'very much worsened' on the PGI-I. Abbreviations: MID, Minimal important difference; OAB-q SF, Overactive Bladder Questionnaire short form; PGI-I, Perceived Global Impression of Improvement.

**Table 3.** Change scores for the IPSS and OAB-q SF by PGI-I outcomes: subgroup analysis for GP prescriptions

| PGI-I outcome          | N (%)            | IPSS                 | Missing  | OAB-q SF               | Missing  |
|------------------------|------------------|----------------------|----------|------------------------|----------|
| Very much better       | 4 (3.1)          | 18.0 (1.7;34.3)      | 1        | 30.8 (-0.9;62.4)       | 0        |
| Much better            | 39 (30.2)        | 9.2 (7.0;11.5)       | 2        | 19.9 (14.8;24.9)       | 2        |
| <b>A little better</b> | <b>57 (44.2)</b> | <b>5.4 (4.0;6.7)</b> | <b>3</b> | <b>11.2 (7.0;15.4)</b> | <b>3</b> |
| No change              | 27 (20.9)        | 3.1 (0.5;5.6)        | 0        | 3.3 (-3.4;9.9)         | 3        |
| A little worse         | 2 (1.6)          | -8.5 (-11.6.5; 99.5) | 0        | -16.5 (-353.2;320.2)   | 0        |

Change in IPSS and OAB-q SF scores were estimated by comparing symptom scores between baseline and 6 weeks. Mean change and 95% CIs are presented. Outcomes are inverted so that positive changes reflect symptom improvement. The PGI-I category 'a little better' reflects the MID for both questionnaires. None of the participants scored 'much worsened' or 'very much worsened' on the PGI-I. Abbreviations: MID, Minimal important difference; OAB-q SF, Overactive Bladder Questionnaire short form; PGI-I, Perceived Global Impression of Improvement.

**Table 4.** Change scores for the IPSS by PGI-I outcomes

| PGI-I outcome          | Moderate symptoms (n = 88) |                   |         | Severe symptoms (n = 73) |                  |
|------------------------|----------------------------|-------------------|---------|--------------------------|------------------|
|                        | N (%)                      | Change            | Missing | N (%)                    | Change           |
| Very much better       | 3 (3.4)                    | 6.5 (-50.7;63.7)  | 1       | 3 (4.1)                  | 18 (1.7;34.3)    |
| Much better            | 30 (34.1)                  | 5.6 (3.7;7.5)     | 1       | 19 (26.0)                | 13.5 (10.5;16.5) |
| <b>A little better</b> | 33 (37.5)                  | 3.2 (1.7;4.8)     | 0       | 32 (43.8)                | 7.1 (5.3;9.0)    |
| No change              | 19 (21.6)                  | 1.3 (-1.7;4.3)    | 0       | 19 (26.0)                | 4.9 (2.3;7.6)    |
| A little worse         | 3 (3.4)                    | -5.0 (-31.0;20.9) | 0       | 0 (0.0)                  | -                |

These results are stratified by baseline symptom severity on the IPSS: moderate symptoms are scores of 8–19 and severe symptoms are scores of  $\geq 20$ . Change in IPSS scores were estimated by comparing symptom scores between baseline and 6 weeks. Mean change and 95% CIs are presented. Outcomes are inverted so that positive changes reflect symptom improvement. The PGI-I category ‘a little better’ reflects the MID for both questionnaires. None of the participants scored ‘much worsened’ or ‘very much worsened’ on the PGI-I. Abbreviations: MID, Minimal important difference; OAB-q SF, Overactive Bladder Questionnaire short form; PGI-I, Perceived Global Impression of Improvement.

1  
2  
3  
4  
5  
6  
7  
8  
9  
10  
11  
12  
13  
14  
15  
16  
17  
18  
19  
20  
21  
22  
23  
24  
25  
26  
27  
28  
29  
30  
31  
32  
33  
34  
35  
36  
37  
38  
39  
40  
41  
42  
43  
44  
45  
46  
47  
48  
49  
50  
51  
52  
53  
54  
55  
56  
57  
58  
59  
60

For peer review only

STROBE Statement—Checklist of items that should be included in reports of *cohort studies*

|                              | Item No | Recommendation                                                                                                                                                                                                                                                                                                         | Page No       |
|------------------------------|---------|------------------------------------------------------------------------------------------------------------------------------------------------------------------------------------------------------------------------------------------------------------------------------------------------------------------------|---------------|
| <b>Title and abstract</b>    | 1       | (a) Indicate the study's design with a commonly used term in the title or the abstract<br>(b) Provide in the abstract an informative and balanced summary of what was done and what was found                                                                                                                          | 2<br>2        |
| <b>Introduction</b>          |         |                                                                                                                                                                                                                                                                                                                        |               |
| Background/rationale         | 2       | Explain the scientific background and rationale for the investigation being reported                                                                                                                                                                                                                                   | 4             |
| Objectives                   | 3       | State specific objectives, including any prespecified hypotheses                                                                                                                                                                                                                                                       | 4             |
| <b>Methods</b>               |         |                                                                                                                                                                                                                                                                                                                        |               |
| Study design                 | 4       | Present key elements of study design early in the paper                                                                                                                                                                                                                                                                | 4-5           |
| Setting                      | 5       | Describe the setting, locations, and relevant dates, including periods of recruitment, exposure, follow-up, and data collection                                                                                                                                                                                        | 5             |
| Participants                 | 6       | (a) Give the eligibility criteria, and the sources and methods of selection of participants. Describe methods of follow-up<br>(b) For matched studies, give matching criteria and number of exposed and unexposed                                                                                                      | 5             |
| Variables                    | 7       | Clearly define all outcomes, exposures, predictors, potential confounders, and effect modifiers. Give diagnostic criteria, if applicable                                                                                                                                                                               | 5-6           |
| Data sources/<br>measurement | 8*      | For each variable of interest, give sources of data and details of methods of assessment (measurement). Describe comparability of assessment methods if there is more than one group                                                                                                                                   | 5-6           |
| Bias                         | 9       | Describe any efforts to address potential sources of bias                                                                                                                                                                                                                                                              | 7             |
| Study size                   | 10      | Explain how the study size was arrived at                                                                                                                                                                                                                                                                              | -             |
| Quantitative variables       | 11      | Explain how quantitative variables were handled in the analyses. If applicable, describe which groupings were chosen and why                                                                                                                                                                                           | 6             |
| Statistical methods          | 12      | (a) Describe all statistical methods, including those used to control for confounding<br>(b) Describe any methods used to examine subgroups and interactions<br>(c) Explain how missing data were addressed<br>(d) If applicable, explain how loss to follow-up was addressed<br>(e) Describe any sensitivity analyses | 6-7<br>6<br>7 |
| <b>Results</b>               |         |                                                                                                                                                                                                                                                                                                                        |               |
| Participants                 | 13*     | (a) Report numbers of individuals at each stage of study—eg numbers potentially eligible, examined for eligibility, confirmed eligible, included in the study, completing follow-up, and analysed<br>(b) Give reasons for non-participation at each stage<br>(c) Consider use of a flow diagram                        | 7             |
| Descriptive data             | 14*     | (a) Give characteristics of study participants (eg demographic, clinical, social) and information on exposures and potential confounders<br>(b) Indicate number of participants with missing data for each variable of interest<br>(c) Summarise follow-up time (eg, average and total amount)                         | 7<br>7<br>7   |
| Outcome data                 | 15*     | Report numbers of outcome events or summary measures over time                                                                                                                                                                                                                                                         | -             |

|    |                          |    |                                                                                                                                                                                                              |       |
|----|--------------------------|----|--------------------------------------------------------------------------------------------------------------------------------------------------------------------------------------------------------------|-------|
| 1  | Main results             | 16 | (a) Give unadjusted estimates and, if applicable, confounder-adjusted estimates and their precision (eg, 95% confidence interval). Make clear which confounders were adjusted for and why they were included | 7-8   |
| 2  |                          |    | (b) Report category boundaries when continuous variables were categorized                                                                                                                                    | 7-8   |
| 3  |                          |    | (c) If relevant, consider translating estimates of relative risk into absolute risk for a meaningful time period                                                                                             |       |
| 4  |                          |    |                                                                                                                                                                                                              |       |
| 5  |                          |    |                                                                                                                                                                                                              |       |
| 6  |                          |    |                                                                                                                                                                                                              |       |
| 7  |                          |    |                                                                                                                                                                                                              |       |
| 8  |                          |    |                                                                                                                                                                                                              |       |
| 9  | Other analyses           | 17 | Report other analyses done—eg analyses of subgroups and interactions, and sensitivity analyses                                                                                                               | 7-8   |
| 10 |                          |    |                                                                                                                                                                                                              |       |
| 11 | <b>Discussion</b>        |    |                                                                                                                                                                                                              |       |
| 12 |                          |    |                                                                                                                                                                                                              |       |
| 13 | Key results              | 18 | Summarise key results with reference to study objectives                                                                                                                                                     | 8     |
| 14 | Limitations              | 19 | Discuss limitations of the study, taking into account sources of potential bias or imprecision. Discuss both direction and magnitude of any potential bias                                                   | 10-11 |
| 15 |                          |    |                                                                                                                                                                                                              |       |
| 16 | Interpretation           | 20 | Give a cautious overall interpretation of results considering objectives, limitations, multiplicity of analyses, results from similar studies, and other relevant evidence                                   | 8-11  |
| 17 |                          |    |                                                                                                                                                                                                              |       |
| 18 |                          |    |                                                                                                                                                                                                              |       |
| 19 | Generalisability         | 21 | Discuss the generalisability (external validity) of the study results                                                                                                                                        | 11    |
| 20 |                          |    |                                                                                                                                                                                                              |       |
| 21 | <b>Other information</b> |    |                                                                                                                                                                                                              |       |
| 22 | Funding                  | 22 | Give the source of funding and the role of the funders for the present study and, if applicable, for the original study on which the present article is based                                                | 3     |
| 23 |                          |    |                                                                                                                                                                                                              |       |
| 24 |                          |    |                                                                                                                                                                                                              |       |

\*Give information separately for exposed and unexposed groups.

**Note:** An Explanation and Elaboration article discusses each checklist item and gives methodological background and published examples of transparent reporting. The STROBE checklist is best used in conjunction with this article (freely available on the Web sites of PLoS Medicine at <http://www.plosmedicine.org/>, Annals of Internal Medicine at <http://www.annals.org/>, and Epidemiology at <http://www.epidem.com/>). Information on the STROBE Initiative is available at <http://www.strobe-statement.org>.

# BMJ Open

## Determining the minimal important differences in the International Prostate Symptom Score and Overactive Bladder Questionnaire: results from an observational cohort study in primary care

|                                 |                                                                                                                                                                                                                                                                                                                                                                                                                                                                                                                                                                                                                                                                                                                                                                                                                                                          |
|---------------------------------|----------------------------------------------------------------------------------------------------------------------------------------------------------------------------------------------------------------------------------------------------------------------------------------------------------------------------------------------------------------------------------------------------------------------------------------------------------------------------------------------------------------------------------------------------------------------------------------------------------------------------------------------------------------------------------------------------------------------------------------------------------------------------------------------------------------------------------------------------------|
| Journal:                        | <i>BMJ Open</i>                                                                                                                                                                                                                                                                                                                                                                                                                                                                                                                                                                                                                                                                                                                                                                                                                                          |
| Manuscript ID                   | bmjopen-2019-032795.R1                                                                                                                                                                                                                                                                                                                                                                                                                                                                                                                                                                                                                                                                                                                                                                                                                                   |
| Article Type:                   | Original research                                                                                                                                                                                                                                                                                                                                                                                                                                                                                                                                                                                                                                                                                                                                                                                                                                        |
| Date Submitted by the Author:   | 14-Oct-2019                                                                                                                                                                                                                                                                                                                                                                                                                                                                                                                                                                                                                                                                                                                                                                                                                                              |
| Complete List of Authors:       | Blanker, Marco; University of Groningen, University Medical Center Groningen, department of General Practice and Elderly Care Medicine<br>Alma, Harma; University of Groningen, University Medical Center Groningen, Department of General Practice and Elderly Care Medicine;<br>University of Groningen, University Medical Center Groningen, Groningen Research Institute for Asthma and COPD (GRIAC)<br>Devji, Tahira; McMaster University Faculty of Health Sciences, Clinical Epidemiology and Biostatistics<br>Roelofs, Marjan; University of Groningen, University Medical Center Groningen, department of General Practice and Elderly Care Medicine<br>Steffens, Martijn ; Isala Hospitals, urology<br>van der Worp, Henk; University of Groningen, University medical center groningen, Department General Practice and Elderly Care Medicine |
| <b>Primary Subject Heading</b>: | General practice / Family practice                                                                                                                                                                                                                                                                                                                                                                                                                                                                                                                                                                                                                                                                                                                                                                                                                       |
| Secondary Subject Heading:      | Urology, Epidemiology                                                                                                                                                                                                                                                                                                                                                                                                                                                                                                                                                                                                                                                                                                                                                                                                                                    |
| Keywords:                       | Lower Urinary Tract Symptoms, Adrenergic alpha-Antagonists, Primary Health Care, Minimal Clinically Important Difference, Patient outcome assessment                                                                                                                                                                                                                                                                                                                                                                                                                                                                                                                                                                                                                                                                                                     |
|                                 |                                                                                                                                                                                                                                                                                                                                                                                                                                                                                                                                                                                                                                                                                                                                                                                                                                                          |

SCHOLARONE™  
Manuscripts



1  
2  
3 **Determining the minimal important differences in the International Prostate**  
4  
5 **Symptom Score and Overactive Bladder Questionnaire: results from an**  
6  
7 **observational cohort study in primary care**  
8  
9

10  
11  
12 M.H. (Marco) Blanker<sup>1</sup>, H.J. (Harma) Alma<sup>1</sup>, T. (Tahira) Devji<sup>2</sup>, M. (Marjan) Roelofs<sup>1</sup>, M.G.  
13  
14 (Martijn) Steffens<sup>3</sup>, H. (Henk) van der Worp<sup>1</sup>  
15  
16

- 17  
18  
19 1. Department of General Practice and Elderly Care Medicine, University Medical Centre  
20  
21 Groningen, University of Groningen  
22  
23 2. Department of Health Research Methods, Evidence and Impact, McMaster University,  
24  
25 Canada  
26  
27 3. Department of Urology, Isala Clinics, Zwolle, The Netherlands  
28  
29  
30

31  
32 Corresponding author: Marco H. Blanker, MD PhD, general practitioner and epidemiologist,  
33  
34 Department of General Practice and Elderly Care Medicine, University Medical Centre  
35  
36 Groningen, University of Groningen, P.O. box 196, 9700 AD Groningen, The Netherlands, Phone:  
37  
38 +31 6 14961542, Fax: +31 50 3632964  
39  
40

41  
42 E-mail addresses: [m.h.blanker@umcg.nl](mailto:m.h.blanker@umcg.nl), [h.j.alma@umcg.nl](mailto:h.j.alma@umcg.nl), [devjits@mcmaster.ca](mailto:devjits@mcmaster.ca),  
43  
44 [marjanroelofs@hotmail.com](mailto:marjanroelofs@hotmail.com), [m.steffens@isala.nl](mailto:m.steffens@isala.nl), [h.van.der.worp@umcg.nl](mailto:h.van.der.worp@umcg.nl)  
45  
46

47  
48 **Wordcount:** 3,116

49  
50 **Keywords:** Lower Urinary Tract Symptoms; Adrenergic alpha-Antagonists; Primary  
51  
52 Health Care; Minimal Clinically Important Difference; Patient outcome assessment  
53  
54  
55  
56  
57  
58  
59  
60

## ABSTRACT

**Objectives:** To determine the minimal important difference (MID) of the International Prostate Symptom Score (IPSS) and the Overactive Bladder Questionnaire short form (OAB-q SF) assessed in primary care among patients treated for lower urinary tract symptoms (LUTS).

**Design:** Single-arm, open-label observational cohort study with a 6-week follow-up.

**Setting:** Twenty-two pharmacies in the Netherlands.

**Participants:** We enrolled Dutch men with uncomplicated LUTS who received a new alpha-blocker prescription from their general practitioner or urologist.

**Primary and secondary outcomes:** The IPSS and OAB-q SF were completed before and after 6 weeks of therapy. At 6 weeks, men also completed the Patient Global Impression of Improvement (PGI-I). The mean change scores of the IPSS and OAB-q SF were calculated for each PGI-I outcome category, with the category 'a little better' used to determine the MID. The standard error of measurement (SEM) was calculated for each questionnaire.

**Results:** In total, 165 men completed follow-up. The MID was 5.2 points (95%CI, 3.9–6.4; SEM 3.6) for the IPSS and 11.0 points (95%CI, 7.1–14.9; SEM 9.7) for the OAB-q SF. For both questionnaires, confidence intervals showed an overlap with the no-change categories. However, the MID for the IPSS was higher in men with severe baseline symptoms (7.1; 95%CI, 5.3–9.0) than in men with moderate baseline symptoms (3.2; 95%CI, 1.7–4.8).

**Conclusion:** In this study, the MID for the IPSS was considerably higher than the MID of 3.1 reported in the only other study on this topic, but may be due to methodological differences. Interpretation of the MID for the OAB-q SF is hampered by the overlap with the SEM. Future studies are needed to confirm our results because correlations between the PGI-I and symptom questionnaires were suboptimal.

## ARTICLE SUMMARY

### Strengths and limitations of this study:

- We assessed the minimal important difference (MID) of two frequently used questionnaires

1  
2  
3 on lower urinary tract symptoms.  
4

- 5 • Given that many men are treated in primary care, MID values for this setting are  
6 particularly important to inform evidence-based decision-making and to facilitate  
7 interpretation of the IPSS and OAB-q SF.  
8  
9
- 10 • Notably, the sample size of this study was small, which resulted in very low numbers of men  
11 being included in the PGI-I category 'very much better' or 'worsening of symptoms', and may  
12 clarify the small overlap of the confidence intervals with the no-change category.  
13  
14  
15  
16  
17  
18  
19

20 **Funding statement:** This work was supported by The Hein Hogerzeil Foundation with an  
21 unrestricted grant. The Foundation was not involved in the design of this study, nor in the data  
22 collection, data analyses, interpretation of the outcomes, or the writing of this manuscript.  
23  
24  
25

26  
27  
28 **Conflict of interest statement:** All authors have completed the ICMJE uniform disclosure form  
29 at [www.icmje.org/coi\\_disclosure.pdf](http://www.icmje.org/coi_disclosure.pdf) and declare: no support from any organisation for the  
30 submitted work; no financial relationships with any organisations that might have an interest in  
31 the submitted work in the previous three years; no other relationships or activities that could  
32 appear to have influenced the submitted work.  
33  
34  
35  
36  
37  
38  
39  
40  
41  
42  
43  
44  
45  
46  
47  
48  
49  
50  
51  
52  
53  
54  
55  
56  
57  
58  
59  
60

## INTRODUCTION

Symptom severity is a key outcome for patients with LUTS and is most often evaluated by direct patient inquiry, using patient-reported outcome measures (PROMs). Although the IPSS is most often used for this purpose in both clinical trials and practice,<sup>1-5</sup> it fails to capture problematic symptoms such as urinary incontinence and urgency. Therefore, the Overactive Bladder Questionnaire (OAB-q) is increasingly being used to evaluate the treatment of overactive bladder,<sup>6,7</sup> with the short form (i.e., OAB-q SF) having the advantage of being less time consuming.<sup>8</sup> Together, both of the IPSS and OAB-q SF capture the spectrum of outcomes that are important to patients, but it is difficult to interpret the effects of an intervention expressed as mean scores or change scores over time.

The minimal important difference (MID) has proven invaluable when interpreting PROMs and could be of great value for both the IPSS and OAB-q SF.<sup>9,10</sup> To date, the MID has only been reported for the IPSS in a study conducted in secondary care among participants of clinical trials.<sup>1,2</sup> There has been no report of the MID for the OAB-q SF in any care setting. In countries like the Netherlands and the United Kingdom, most men with LUTS first visit their GP to seek treatment. Given that setting may affect the MID, possibly because of differences in baseline symptom severity,<sup>9-11</sup> we feel that it is important to assess the MID in a primary care setting. Knowledge about the MID in primary care will then provide invaluable data for interpreting treatment outcomes that may differ between primary and secondary care. In addition, evidence must be obtained from multiple studies to ensure that MID determinations are accurate.

In the current study, we aimed to determine the MIDs for both the IPSS and OAB-q SF in a patient cohort originating mainly from primary care.

## METHODS

### Study design

We conducted a prospective cohort study between January 2016 and April 2018.<sup>12</sup> Baseline data for the IPSS and OAB-q SF were compared with follow-up data after 6 weeks of treatment.

1  
2  
3 At follow-up, participants also completed the Patient Global Impression of Improvement (PGI-I)  
4  
5 and we calculated the MID.  
6

### 7 **Participants**

8  
9 Adult men who visited a participating pharmacy in the north of the Netherlands were included  
10  
11 if they received a new alpha-blocker prescription for uncomplicated LUTS from a GP or  
12  
13 urologist. A prescription was defined as new if no alpha-blocker prescription had been given  
14  
15 within the past year. The pharmacists checked if the alpha-blocker was indicated for LUTS and  
16  
17 excluded men prescribed alpha-blockers for urinary tract stones or indwelling catheters. All  
18  
19 participants provided written informed consent. The medical ethics committee of the University  
20  
21 Medical Centre Groningen, the Netherlands, approved the study (number 2016.122).  
22  
23

### 24 **Data collection**

25  
26 At baseline, before starting alpha-blocker therapy, all participants provided relevant descriptive  
27  
28 data (e.g., age, duration of LUTS in months or years, and history of surgery for LUTS) and  
29  
30 completed the Dutch versions of the IPSS and OAB-q SF. After 6 weeks, men who consented  
31  
32 repeated the IPSS and OAB-q SF by postal invitation. At this time, we asked participants to  
33  
34 complete the Patient Global Impression of Improvement (PGI-I) questionnaire.<sup>13</sup> The period of  
35  
36 six weeks was chosen as clinical effects of alpha-blockers take a few weeks to develop fully, but  
37  
38 significant efficacy over placebo can occur within hours to days.<sup>4,14</sup>  
39

### 40 **Questionnaires**

41  
42 The IPSS contains seven questions and produces a total score that may range from 0 (no  
43  
44 symptoms) to 35 points (maximum score).<sup>1</sup> Each question has response options ranging from 0  
45  
46 to five, with higher scores reflecting more severe symptoms. IPSS scores are often categorized  
47  
48 as no/mild symptoms (0–7 points), moderate symptoms (8–19 points), or severe symptoms  
49  
50 ( $\geq 20$  points). The IPSS was internally consistent (Cronbach's alpha = 0.86) and has excellent  
51  
52 test-retest reliability ( $r = 0,92$ ).<sup>1</sup> The MID for the IPSS is currently considered to be 3.1 points.<sup>2</sup>  
53  
54 The OAB-q SF contains six questions on 6-point Likert-type scales, with the outcomes  
55  
56 transformed to a 0–100 point scale in which higher scores indicate more severe symptoms.<sup>8</sup>  
57  
58  
59  
60

1  
2  
3 This scale demonstrated good convergent validity, discriminant validity, internal reliability,  
4 reproducibility, and responsiveness to change.<sup>8</sup> The PGI-I is a validated generic tool for  
5 assessing overall improvement after treatment and is answered on a 7-point Likert-type scale,  
6 with the following options: 'very much better', 'much better', 'a little better', 'no change', 'a little  
7 worse', 'much worse' or 'very much worse'.<sup>13,15</sup> Full versions of these questionnaires are  
8 presented as supplementary file 1.

9  
10 We sent a reminder after two weeks to patients who did not respond to follow-up requests.

### 11 **Data analyses**

12 Baseline characteristics are reported as continuous variables and summarized as mean and SD  
13 or as median and interquartile range, depending on the distribution checked by the Shapiro-  
14 Wilk test. These characteristics were also compared between men with and without completed  
15 follow-up data to test for selective nonresponse. Next, the change scores of the IPSS and OAB-q  
16 SF were calculated by comparing the data between the baseline and follow-up questionnaires.  
17 Change scores were inverted to facilitate intuitive interpretation, with positive scores reflecting  
18 symptom improvement.

19  
20 Various methods exist to determine the MID of questionnaires and are typically either  
21 anchor-based or distribution-based.<sup>9,16-18</sup> The latter involve evaluating change in the PROM  
22 with the probability that the change occurred by chance, sample variation or measurement  
23 precision; however, they do not reflect patient perspectives.<sup>17,19</sup> Thus, we used an anchor-based  
24 method,<sup>9</sup> in which we compared changes in the IPSS or OAB-q SF (PROM) with the PGI-I (the  
25 anchor). For each PGI-I category, we then present the mean change in scores from baseline to  
26 follow-up with the associated CIs. We defined the MID as the mean change in IPSS or OAB-q SF  
27 for the PGI-I category 'a little better', but still present the mean change scores for the other PGI-I  
28 categories.

29  
30 The usefulness of anchor-based approaches depends on the relationship between the  
31 PROM and the anchor.<sup>20-22</sup> The anchor and PROM should be measuring the same or similar  
32 underlying constructs and should therefore be appreciably correlated. Correlations between  
33  
34  
35  
36  
37  
38  
39  
40  
41  
42  
43  
44  
45  
46  
47  
48  
49  
50  
51  
52  
53  
54  
55  
56  
57  
58  
59  
60

1  
2  
3 questionnaire change scores and the anchor PGI-I should be obviously strong, as else these  
4  
5 measure different concepts. Correlations between the anchor PGI-I and the baseline and follow-  
6  
7 up questionnaire scores are performed to check for a possible response shift. Mostly anchor  
8  
9 PGI-I scores seem correlated with follow-up scores (due to response shift). We therefore  
10  
11 examined the Spearman correlation coefficients between the PGI-I and the IPSS and OAB-q SF  
12  
13 for the baseline, follow-up and change data to ensure the anchor's validity. A correlation  
14  
15 coefficient between the symptom change scores and the PGI-I of  $\geq 0.50$ , and an equal and  
16  
17 opposite correlation of the PGI-I with the baseline score and the follow-up score, were  
18  
19 considered ideal and likely to yield trustworthy MID estimates.<sup>20-22</sup>

22  
23 To test the impact of baseline symptom severity on the distribution of results, a  
24  
25 stratified analysis was performed for the IPSS categories 'moderate symptoms' and 'severe  
26  
27 symptoms' because previous research has shown that such stratification has a large impact.<sup>2</sup> No  
28  
29 such categories have been defined for the OAB-q SF, so we did not perform a similar analysis for  
30  
31 this questionnaire. Subgroup analyses were also performed with participants who received  
32  
33 their prescription from their GP, allowing us to provide data that focused on the primary care  
34  
35 setting. Finally, we checked if the MID exceeded the measurement error.<sup>15,17</sup> For this, we  
36  
37 calculated the standard error of measurement (SEM) as follows:  $[SD \times (1 - \text{reliability})^{1/2}]$ .  
38  
39 Cronbach's alpha was used as the reliability measure.<sup>23</sup>

41  
42 The complete data set was used without imputing missing data. All analyses were  
43  
44 performed using IBM SPSS version 25.0 (IBM Corp., Armonk, NY, USA), and we considered a p-  
45  
46 value  $< 0.05$  to be statistically significant.

### 48 **Patient and public involvement**

49  
50 This study was performed without patient involvement. We did not invite patients to comment  
51  
52 on the study design nor did we consult them to interpret the results. Patients were not invited  
53  
54 to contribute to the writing or editing of this document for readability or accuracy.

## 58 **RESULTS**

A total of 251 men completed the baseline questionnaires, of which 165 also completed the follow-up questionnaires. The baseline characteristics of men with and without follow-up data are shown in Table 1, with no statistically significant differences found between these groups. Notably, 86.3% of the participants received their prescription from a GP and the remainder received it from a urologist.

**Table 1.** Baseline characteristics of all participants and participants who dropped out after the baseline questionnaire

|                                           | Participants with completed follow-up (n = 165) | Drop out after baseline (n = 86) | p-value |
|-------------------------------------------|-------------------------------------------------|----------------------------------|---------|
| Age (mean ± SD)                           | 66.7±9.7                                        | 65.4±12.1                        | 0.42*   |
| Prescription from GP (%)                  | 86.3                                            | 83.2                             | 0.55#   |
| IPSS score (mean ± SD)                    | 19.1±6.8                                        | 17.6±6.5                         | 0.11*   |
| IPSS categories (%)                       |                                                 |                                  | 0.12#   |
| - none/mild                               | 3.7                                             | 6.4                              |         |
| - moderate                                | 50.9                                            | 61.5                             |         |
| - severe                                  | 45.3                                            | 32.1                             |         |
| IPSS Quality of Life (median   IQR)       | 4.0   3.0-5.0                                   | 4.0   3.0-5.0                    | 0.52§   |
| OAB-q SF (mean ± SD)                      | 39.8±19.2                                       | 40.7±18.1                        | 0.70*   |
| Duration of LUTS in months (median   IQR) | 24.0   5.0-42.0                                 | 12.0   3.0-36.0                  | 0.11§   |
| History of surgery for LUTS (%)           | 1.2                                             | 3.8                              | 0.19#   |

IQR: interquartile range. P-values refer to: \* student-t-test; # chi-squared test; § Mann-Whitney U test.

Abbreviations: OAB-q SF, Overactive Bladder Questionnaire short form.

There were mean improvements in the IPSS and OAB-q SF scores during the study of 5.8 (SD 6.7) and 11.8 points (SD 17.4), respectively. Between baseline and follow-up at 6 weeks, the mean IPSS score changed from 19.1 (SD 6.8) to 13.3 (SD 6.5) and the mean OAB-q SF score



changed from 39.7 (SD 19.2) to 27.9 (SD 16.9). The PGI-I outcomes are shown in Table 2 and indicate that most men reported that they were 'a little better' or 'much better' (74.7%), whilst only 23.5% perceived no change. Only three men (1.8%) reported 'worsened' symptoms, and none of the participants reported 'much worsened' or 'very much worsened' symptoms.

**Table 2.** Change scores for the IPSS and OAB-q SF by PGI-I outcomes

| PGI-I outcome          | N (%)            | IPSS                 | Missing  | OAB-q SF               | Missing  |
|------------------------|------------------|----------------------|----------|------------------------|----------|
| Very much better       | 6 (3.6)          | 13.4 (2.9;23.9)      | 1        | 23.8 (2.3;45.3)        | 0        |
| Much better            | 50 (30.3)        | 8.7 (6.8;10.7)       | 2        | 19.1 (14.3;24.0)       | 3        |
| <b>A little better</b> | <b>68 (41.2)</b> | <b>5.2 (3.9;6.4)</b> | <b>3</b> | <b>11.0 (7.1;14.9)</b> | <b>4</b> |
| No change              | 38 (23.0)        | 3.1 (1.1;5.1)        | 0        | 3.0 (-2.3;8.4)         | 4        |
| A little worse         | 3 (1.8)          | -5.0 (-30.9;20.9)    | 0        | -9.7 (-81.7;62.4)      | 0        |

Change in IPSS and OAB-q SF scores were estimated by comparing symptom scores between baseline and 6 weeks. Mean change and 95% CIs are presented. Outcomes are inverted so that positive changes reflect symptom improvement. The PGI-I category 'a little better' reflects the MID for both questionnaires. None of the participants scored 'much worsened' or 'very much worsened' on the PGI-I. Abbreviations: MID, Minimal important difference; OAB-q SF, Overactive Bladder Questionnaire short form; PGI-I, Patient Global Impression of Improvement.

Table 2 also shows the distribution of changes in the IPSS and OAB-q SF for each PGI-I category. The MID for the IPSS was 5.2 points (95% CI, 3.9–6.4) and the PGI-I outcomes 'no change' and 'much better' corresponded to IPSS symptom changes of 3.1 points (95% CI, 1.1–5.1) and 8.7 points (95% CI, 6.8–10.7), respectively. The MID for the OAB-q SF was 11.0 points (95% CI, 7.1 to 14.9) and the PGI-I outcomes 'no change' and 'much better' corresponded with mean improvements of 3.0 points (95% CI, -2.3 to 8.4) and 19.1 points (95% CI, 14.3–24.0), respectively. For both questionnaires, the confidence intervals of the MID-categories showed an overlap with the 'no change' categories.

The Spearman correlation coefficients were then calculated between the PGI-I and both

the IPSS and the OAB-q SF. The correlation was -0.51 for the PGI-I and baseline IPSS, 0.43 for the PGI-I and follow-up IPSS and 0.38 for the PGI-I and change in IPSS. The corresponding correlations for the OAB-q SF were -0.09 at baseline, 0.36 at follow-up and 0.42 for the change.

**Table 3.** Change scores for the IPSS and OAB-q SF by PGI-I outcomes: subgroup analysis for GP prescriptions

| PGI-I outcome          | N (%)            | IPSS                 | Missing  | OAB-q SF               | Missing  |
|------------------------|------------------|----------------------|----------|------------------------|----------|
| Very much better       | 4 (3.1)          | 18.0 (1.7;34.3)      | 1        | 30.8 (-0.9;62.4)       | 0        |
| Much better            | 39 (30.2)        | 9.2 (7.0;11.5)       | 2        | 19.9 (14.8;24.9)       | 2        |
| <b>A little better</b> | <b>57 (44.2)</b> | <b>5.4 (4.0;6.7)</b> | <b>3</b> | <b>11.2 (7.0;15.4)</b> | <b>3</b> |
| No change              | 27 (20.9)        | 3.1 (0.5;5.6)        | 0        | 3.3 (-3.4;9.9)         | 3        |
| A little worse         | 2 (1.6)          | -8.5 (-11.6.5; 99.5) | 0        | -16.5 (-353.2;320.2)   | 0        |

Change in IPSS and OAB-q SF scores were estimated by comparing symptom scores between baseline and 6 weeks. Mean change and 95% CIs are presented. Outcomes are inverted so that positive changes reflect symptom improvement. The PGI-I category 'a little better' reflects the MID for both questionnaires. None of the participants scored 'much worsened' or 'very much worsened' on the PGI-I. Abbreviations: MID, Minimal important difference; OAB-q SF, Overactive Bladder Questionnaire short form; PGI-I, Patient Global Impression of Improvement.

Subgroup analyses of data for men with a prescription from a GP found no relevant differences, with MID values of 5.4 for the IPSS and 11.2 for the OAB-q SF (Table 3). Stratified analysis of baseline data revealed that men with severe symptoms had higher MID values for the IPSS, reaching 7.1 (95% CI, 5.3–9.0), compared with the MID value of 3.2 (95% CI, 1.7–4.8) for men with moderate symptoms (Table 4).

**Table 4.** Change scores for the IPSS by PGI-I outcomes

| PGI-I outcome          | Moderate symptoms (n = 88) |                   |         | Severe symptoms (n = 73) |                  |
|------------------------|----------------------------|-------------------|---------|--------------------------|------------------|
|                        | N (%)                      | Change            | Missing | N (%)                    | Change           |
| Very much better       | 3 (3.4)                    | 6.5 (-50.7;63.7)  | 1       | 3 (4.1)                  | 18 (1.7;34.3)    |
| Much better            | 30 (34.1)                  | 5.6 (3.7;7.5)     | 1       | 19 (26.0)                | 13.5 (10.5;16.5) |
| <b>A little better</b> | 33 (37.5)                  | 3.2 (1.7;4.8)     | 0       | 32 (43.8)                | 7.1 (5.3;9.0)    |
| No change              | 19 (21.6)                  | 1.3 (-1.7;4.3)    | 0       | 19 (26.0)                | 4.9 (2.3;7.6)    |
| A little worse         | 3 (3.4)                    | -5.0 (-31.0;20.9) | 0       | 0 (0.0)                  | -                |

These results are stratified by baseline symptom severity on the IPSS: moderate symptoms are scores of 8–19 and severe symptoms are scores of  $\geq 20$ . Change in IPSS scores were estimated by comparing symptom scores between baseline and 6 weeks. Mean change and 95% CIs are presented. Outcomes are inverted so that positive changes reflect symptom improvement. The PGI-I category ‘a little better’ reflects the MID for both questionnaires. None of the participants scored ‘much worsened’ or ‘very much worsened’ on the PGI-I. Abbreviations: MID, Minimal important difference; OAB-q SF, Overactive Bladder Questionnaire short form; PGI-I, Patient Global Impression of Improvement.

Finally, the SEM was 3.6 for the IPSS and 9.7 for the OAB-q SF.

## DISCUSSION

We estimated the MID for two questionnaires that are often used to assess male LUTS in primary care. However, whereas the SEM of the IPSS was less than the 95% CI of the MID (5.2 points; 95% CI, 3.9–6.4; SEM 3.6), the SEM of the OAB-q SF fell within the 95% CI of the MID (11 points; 95% CI, 7.1–14.9; SEM 9.7). Thus, we can only conclude that the outcomes for the IPSS were unlikely to have occurred because of chance or measurement imprecision. Given that many questionnaires have used multiple MID values, we were surprised to find only one previous estimate of the MID for the IPSS in the literature.<sup>1,2</sup> Our study therefore adds relevant information in the primary care setting for clinicians and guideline developers.

Our results for the IPSS were different to those of the seminal study on this topic performed by Barry et al. in secondary care.<sup>1,2</sup> In that study, the MID of 3.1 points (SD 0.27) fell

1  
2  
3 within the 95% CI of the 'no change' group (consisting of men who expressed that they hadn't  
4 experienced any change in symptoms), but outside the CI of the 'a little better' group, suggesting  
5 a likely underestimation of the real value. In the current study, there was also some overlap  
6 between the CIs of the 'no change' and the 'a little better' group, though this was within a change  
7 of only 3.9 to 5.1 points. Given that treatment is typically in primary care, we have therefore  
8 provided additional data that is applicable to most men with LUTS. Nevertheless, the differences  
9 in outcomes compared with the study by Barry et al. need to be explained. It is our contention  
10 that three methodological differences account for these differences.  
11  
12  
13  
14  
15  
16  
17  
18  
19

20 First, Barry et al. compared patients between baseline and follow-up after 13 weeks. By  
21 contrast, the follow-up period in the current study was only 6 weeks. Although this difference of  
22 7 weeks may have affected the ability of patients to recall their prior health state accurately, the  
23 true impact of this remains unclear. Change scores may also have been influenced by the natural  
24 variation that occurs in symptom severity over time.  
25  
26  
27  
28  
29

30 Second, in the research by Barry et al., a different global assessment of patient  
31 improvement was used. This included a 5-point scale with the options 'marked improvement',  
32 'moderate improvement', 'slight improvement', 'no improvement', and 'worse' for which the  
33 exact question was not reported. In our study, we used a 7-point Likert-type scale that ranged  
34 from 'very much better' to 'very much worsened'. We considered that this difference probably  
35 had no more than a marginal impact given that the positive outcome categories were  
36 comparable in both studies. Notably, none of the participants in our study reported that the  
37 symptoms had 'very' or 'very much' worsened.  
38  
39  
40  
41  
42  
43  
44  
45  
46  
47

48 Third, we mainly included men from primary care, rather than men solely from  
49 secondary care. Although it is generally thought that men in primary care have fewer symptoms,  
50 our men tended to have more severe symptoms (IPSS score >19) than in the study by Barry et  
51 al. (45% versus 25%). Barry et al. also reported that baseline severity had a major impact on the  
52 MID, but when we compare their stratified analysis with ours, we had higher mean change  
53 scores for each PGI-I category. This might be explained by the fact that we only included men  
54  
55  
56  
57  
58  
59  
60

1  
2  
3 who actually used an alpha-blocker. In contrast to this focused approach, Barry et al. used data  
4  
5 for all participants in a large, randomized, double-blind trial of four treatment strategies for  
6  
7 male LUTS. In their study, a lower MID could therefore have resulted from the inclusion of  
8  
9 patients receiving placebo, finasteride, terazosin or combination therapy given that the efficacy  
10  
11 of alpha-blockers exceeds that of both placebo and finasteride. The use of blinding meant that  
12  
13 men who used placebo or finasteride may have overestimated their subjective improvement,  
14  
15 whilst alpha-blocker users may have underestimated their subjective improvement. Given that  
16  
17 the IPSS objectively counts symptoms, the placebo and finasteride users would experience a  
18  
19 smaller change in the IPSS whereas the active drug users would experience a larger effect.  
20  
21 Although the actual impact of each intervention is unknown, researchers in other fields have  
22  
23 made similar observations.<sup>10, 11, 24</sup>  
24  
25

26  
27 We were unable to find any prior estimates of the MID for the OAB-q SF in the literature.  
28  
29 Our finding that 11.0 points (95% CI, 7.1–14.9) indicates a clinically relevant change is therefore  
30  
31 a novel and important finding, but one for which the reliability will need to be assessed in other  
32  
33 studies. We recognize that alpha-blockers are not specifically indicated for the treatment of  
34  
35 overactive bladder, but we contend that there is a considerable overlap with LUTS unrelated to  
36  
37 overactive bladder. Indeed, guidelines suggest prescribing alpha-blockers for most men with  
38  
39 LUTS who request active treatment. This is because these agents have a rapid onset of action,  
40  
41 good efficacy, and low rate and severity of adverse events.<sup>3-5</sup> We recommend further study to  
42  
43 determine the MID in men with specific symptoms of overactive bladder treated with  
44  
45 anticholinergics or beta-3 agonists.  
46  
47

48  
49 Some limitations need to be considered when assessing our results. Notably, the sample  
50  
51 size of this study was small, which resulted in very low numbers of men being included in the  
52  
53 PGI-I category 'very much better'. For that category, the mean change scores for both  
54  
55 questionnaires showed very wide CIs. The same holds for the categories linked to symptom  
56  
57 worsening. In those categories, a discontinuation trial, in which men stop their treatment, may  
58  
59 be more suitable for reliable estimates. The sample size might also explain why the CI of the  
60

1  
2  
3 MID estimate for the OAB-q SF included the SEM.  
4

5 Another limitation is reflected by difficulties we encountered with some of the  
6 associations between the PGI-I and the two PROM questionnaires. For the IPSS, the follow-up  
7 IPSS and PGI-I scores correlated better than with IPSS change and PGI-I scores, suggesting that  
8 this rating only reflected the current status, which in turn, decreases confidence in the MID  
9 estimate. For the OAB-q SF, the correlation coefficient between the baseline OAB-q SF and PGI-I  
10 scores was opposite in magnitude to that for the follow-up OAB-q SF and PGI-I scores. With both  
11 questionnaires, the correlation coefficients for the change scores were lower than the threshold  
12 of 0.5 that we set a priori.<sup>21</sup> High correlation coefficients are preferred between the anchor and  
13 the change in PROM, though some researchers have suggested applying lower thresholds.<sup>25</sup>  
14 Still, even the high correlation coefficients are insufficient to confirm that the transition rating is  
15 in fact measuring change as opposed to current health status.<sup>21</sup> Unfortunately, Barry et al. did  
16 not report the correlation coefficients between the IPSS and the anchor,<sup>2</sup> which is consistent  
17 with most other research for PROMs.<sup>26</sup> Given the suboptimal relationship between the PROM  
18 and the anchor, we must stress that the estimates obtained for the MID should be interpreted  
19 with caution and should be confirmed in future investigations with larger samples.  
20  
21  
22  
23  
24  
25  
26  
27  
28  
29  
30  
31  
32  
33  
34  
35  
36

37 In conclusion, this study is the first to define MID values for two important PROMs used  
38 to evaluate the effectiveness of treatment for male LUTS in primary care. Given that many men  
39 are treated in primary care, MID values for this setting are particularly important to inform  
40 evidence-based decision-making and to facilitate interpretation of the IPSS and OAB-q SF.  
41 Moreover, we consider that this study emphasizes the importance of the MID to individual  
42 patients in daily practice. We defined the MID based on the PGI-I outcome 'a little better' in the  
43 present study, but patients may expect 'much better' as an outcome when starting therapy. To  
44 date, most outcomes of alpha-blocker and other drug treatments for male LUTS have been  
45 expressed as the mean IPSS change scores. In the vast majority of studies<sup>3</sup>, difference in IPSS  
46 changes between active treatment and placebo have approached, but not exceeded, the  
47 previously reported MID of 3.1.<sup>1,2</sup> Applying a threshold for improvement of 5.2 points, as  
48  
49  
50  
51  
52  
53  
54  
55  
56  
57  
58  
59  
60

1  
2  
3 described in our study, may change the interpretation of those studies.  
4  
5  
6

### 7 **Acknowledgements**

8  
9 We are grateful for the assistance of Tom Vermist in collecting the data. The authors thank all  
10 patients and collaborating pharmacies for their participation, as well as Dr Robert Sykes  
11 (www.doctored.org.uk) for providing editorial services.  
12  
13  
14

### 15 **Author contributions**

16  
17 The corresponding author attests that all listed authors meet authorship criteria and that no  
18 others meeting the criteria have been omitted.  
19  
20

21 MHB and MGS initiated the study. Acquisition of the data was done by MHB and MR. Analysis  
22 and interpretation of the data was done by MHB, HJA, TD and HW. MHB wrote the manuscript  
23 with extensive support from HJA and TD.  
24  
25

26 All authors critically reviewed the manuscript.  
27  
28

### 29 **Data sharing statement**

30  
31 Data collected for this study will be available from the corresponding author upon request.  
32  
33  
34  
35  
36

### 37 **REFERENCES**

38  
39  
40 1 Barry MJ, Fowler FJ, Jr, O'Leary MP, et al. The American Urological Association symptom index  
41 for benign prostatic hyperplasia. The Measurement Committee of the American Urological  
42 Association. *J Urol* 1992;148:1549,57; discussion 1564.  
43

44 2 Barry MJ, Williford WO, Chang Y, et al. Benign prostatic hyperplasia specific health status  
45 measures in clinical research: how much change in the American Urological Association symptom  
46 index and the benign prostatic hyperplasia impact index is perceptible to patients?. *J Urol*  
47 1995;154:1770-4.  
48

49 3 National Clinical Guideline Centre (NICE). Lower urinary tract symptoms in men: management  
50 (Clinical guideline CG97) 2015;CG97  
51 doi:<http://www.nice.org.uk/nicemedia/live/12984/48554/48554.pdf>.  
52

53 4 Gratzke C, Bachmann A, Descazeaud A, et al. EAU Guidelines on the Assessment of Non-  
54 neurogenic Male Lower Urinary Tract Symptoms including Benign Prostatic Obstruction. *Eur Urol*  
55 2015;67:1099-109 doi:10.1016/j.eururo.2014.12.038 [doi].  
56  
57

58 5 Blanker MH, Klomp MA, van den Donk M, et al. Summary of the NHG practice guideline 'Lower  
59 urinary tract symptoms in men'. *Ned Tijdschr Geneeskd* 2013;157:A6178.  
60

- 1  
2  
3 6 Coyne K, Revicki D, Hunt T, et al. Psychometric validation of an overactive bladder symptom and  
4 health-related quality of life questionnaire: the OAB-q. *Qual Life Res* 2002;11:563-74.  
5  
6 7 Coyne KS, Matza LS, Thompson CL. The responsiveness of the Overactive Bladder Questionnaire  
7 (OAB-q). *Qual Life Res* 2005;14:849-55.  
8  
9 8 Coyne KS, Thompson CL, Lai JS, et al. An overactive bladder symptom and health-related quality  
10 of life short-form: validation of the OAB-q SF. *Neurourol Urodyn* 2015;34:255-63  
11 doi:10.1002/nau.22559 [doi].  
12  
13 9 Jaeschke R, Singer J, Guyatt GH. Measurement of health status. Ascertaining the minimal clinically  
14 important difference. *Control Clin Trials* 1989;10:407-15.  
15  
16 10 Terwee CB, Roorda LD, Dekker J, et al. Mind the MIC: large variation among populations and  
17 methods. *J Clin Epidemiol* 2010;63:524-34 doi:10.1016/j.jclinepi.2009.08.010 [doi].  
18  
19 11 Olsen MF, Bjerre E, Hansen MD, et al. Minimum clinically important differences in chronic pain  
20 vary considerably by baseline pain and methodological factors: systematic review of empirical  
21 studies. *J Clin Epidemiol* 2018;101:87,106.e2 doi:S0895-4356(18)30124-0 [pii].  
22  
23 12 van der Worp H, Kollen BJ, Vermist T, et al. Symptom improvement and predictors associated  
24 with improvement after 6 weeks of alpha-blocker therapy: An exploratory, single-arm, open-label  
25 cohort study. *PLoS One* 2019;14:e0220417 doi:10.1371/journal.pone.0220417 [doi].  
26  
27 13 Viktrup L, Hayes RP, Wang P, et al. Construct validation of patient global impression of severity  
28 (PGI-S) and improvement (PGI-I) questionnaires in the treatment of men with lower urinary tract  
29 symptoms secondary to benign prostatic hyperplasia. *BMC Urol* 2012;12:30,2490-12-30  
30 doi:10.1186/1471-2490-12-30 [doi].  
31  
32 14 Barendrecht MM, Abrams P, Schumacher H, et al. Do alpha1-adrenoceptor antagonists improve  
33 lower urinary tract symptoms by reducing bladder outlet resistance?. *Neurourol Urodyn* 2008;27:226-  
34 30 doi:10.1002/nau.20481 [doi].  
35  
36 15 Yalcin I, Bump RC. Validation of two global impression questionnaires for incontinence. *Am J*  
37 *Obstet Gynecol* 2003;189:98-101.  
38  
39 16 Angst F, Aeschlimann A, Angst J. The minimal clinically important difference raised the  
40 significance of outcome effects above the statistical level, with methodological implications for future  
41 studies. *J Clin Epidemiol* 2017;82:128-36 doi:S0895-4356(16)30776-4 [pii].  
42  
43 17 Crosby RD, Kolotkin RL, Williams GR. Defining clinically meaningful change in health-related  
44 quality of life. *J Clin Epidemiol* 2003;56:395-407 doi:S0895435603000441 [pii].  
45  
46 18 Norman GR, Sloan JA, Wyrwich KW. Interpretation of changes in health-related quality of life:  
47 the remarkable universality of half a standard deviation. *Med Care* 2003;41:582-92  
48 doi:10.1097/01.MLR.0000062554.74615.4C [doi].  
49  
50 19 de Vet HC, Terwee CB. The minimal detectable change should not replace the minimal important  
51 difference. *J Clin Epidemiol* 2010;63:804,5; author reply 806 doi:10.1016/j.jclinepi.2009.12.015  
52 [doi].  
53  
54 20 Cella D, Hahn EA, Dineen K. Meaningful change in cancer-specific quality of life scores:  
55 differences between improvement and worsening. *Qual Life Res* 2002;11:207-21.  
56  
57  
58  
59  
60



1  
2  
3 21 Guyatt GH, Norman GR, Juniper EF, et al. A critical look at transition ratings. *J Clin Epidemiol*  
4 2002;55:900-8 doi:S0895435602004353 [pii].  
5

6 22 Guyatt GH, Jaeschke RJ. Reassessing quality-of-life instruments in the evaluation of new drugs.  
7 *Pharmacoeconomics* 1997;12:621-6 doi:10.2165/00019053-199712060-00002 [doi].  
8

9 23 Wyrwich KW, Tierney WM, Wolinsky FD. Using the standard error of measurement to identify  
10 important changes on the Asthma Quality of Life Questionnaire. *Qual Life Res* 2002;11:1-7.  
11

12 24 Devji T, Guyatt GH, Lytvyn L, et al. Application of minimal important differences in degenerative  
13 knee disease outcomes: a systematic review and case study to inform BMJ Rapid Recommendations.  
14 *BMJ Open* 2017;7:e015587,2016-015587 doi:10.1136/bmjopen-2016-015587 [doi].  
15  
16

17 25 Revicki D, Hays RD, Cella D, et al. Recommended methods for determining responsiveness and  
18 minimally important differences for patient-reported outcomes. *J Clin Epidemiol* 2008;61:102-9  
19 doi:10.1016/j.jclinepi.2007.03.012 [doi].  
20

21 26 Alma H, de Jong C, Tsiligianni I, et al. Clinically relevant differences in COPD health status:  
22 systematic review and triangulation. *Eur Respir J* 2018;52:1800412 doi:10.1183/13993003.00412.  
23  
24  
25  
26  
27  
28  
29  
30  
31  
32  
33  
34  
35  
36  
37  
38  
39  
40  
41  
42  
43  
44  
45  
46  
47  
48  
49  
50  
51  
52  
53  
54  
55  
56  
57  
58  
59  
60

**INTERNATIONAL-PROSTATE SYMPTOM SCORE (IPSS)**

|                                                                                                                                                                  | Not at all | Less than 1 time in 5 | Less than half the time | About half the time | More than half the time | Almost always   |
|------------------------------------------------------------------------------------------------------------------------------------------------------------------|------------|-----------------------|-------------------------|---------------------|-------------------------|-----------------|
| 1. Over the past 4 weeks, how often have you had a sensation of not emptying your bladder completely after you finished urinating?                               | 0          | 1                     | 2                       | 3                   | 4                       | 5               |
| 2. Over the past 4 weeks, how often have you had to urinate again less than two hours after you finished urinating?                                              | 0          | 1                     | 2                       | 3                   | 4                       | 5               |
| 3. Over the past 4 weeks, how often have you found you stopped and started again several times when you urinated?                                                | 0          | 1                     | 2                       | 3                   | 4                       | 5               |
| 4. Over the past 4 weeks, how often have you found it difficult to postpone urination?                                                                           | 0          | 1                     | 2                       | 3                   | 4                       | 5               |
| 5. Over the past 4 weeks, how often has your urinary stream been weaker than usual?                                                                              | 0          | 1                     | 2                       | 3                   | 4                       | 5               |
| 6. Over the past 4 weeks, how often have you had to push or strain to begin urination?                                                                           | 0          | 1                     | 2                       | 3                   | 4                       | 5               |
|                                                                                                                                                                  | None       | 1 time                | 2 times                 | 3 times             | 4 times                 | 5 or more times |
| 7. Over the past 4 weeks, how many times, in general, did you get up to urinate from the time you went to bed at night until the time you got up in the morning? | 0          | 1                     | 2                       | 3                   | 4                       | 5               |

**IPSS Quality of life question**

|                                                                                                                               | Delighted | Pleased | Mostly satisfied | Mixed - neither satisfied nor dissatisfied | Mostly dissatisfied | Unhappy | Terrible |
|-------------------------------------------------------------------------------------------------------------------------------|-----------|---------|------------------|--------------------------------------------|---------------------|---------|----------|
| If you were to spend the rest of your life with your urinary condition just the way it is now, how would you feel about that? | 0         | 1       | 2                | 3                                          | 4                   | 5       | 6        |

**OAB-q-SF**

This questionnaire asks about how much you have been bothered by selected bladder symptoms during the past 4 weeks. Please place a ✓ or x in the box that best describes the extent to which you were bothered by each symptom during the past 4 weeks. There are no right or wrong answers. Please be sure to answer every question.

During the past 4 weeks, how bothered were you by...

|                                                           | Not at all               | A little bit             | Some-<br>what            | Quite a<br>bit           | A great<br>deal          | A very<br>great<br>deal  |
|-----------------------------------------------------------|--------------------------|--------------------------|--------------------------|--------------------------|--------------------------|--------------------------|
| 1. An uncomfortable urge to urinate?                      | <input type="checkbox"/> | <input type="checkbox"/> | <input type="checkbox"/> | <input type="checkbox"/> | <input type="checkbox"/> | <input type="checkbox"/> |
| 2. A sudden urge to urinate with little or no warning?    | <input type="checkbox"/> | <input type="checkbox"/> | <input type="checkbox"/> | <input type="checkbox"/> | <input type="checkbox"/> | <input type="checkbox"/> |
| 3. Accidental loss of small amounts of urine?             | <input type="checkbox"/> | <input type="checkbox"/> | <input type="checkbox"/> | <input type="checkbox"/> | <input type="checkbox"/> | <input type="checkbox"/> |
| 4. Nighttime urination?                                   | <input type="checkbox"/> | <input type="checkbox"/> | <input type="checkbox"/> | <input type="checkbox"/> | <input type="checkbox"/> | <input type="checkbox"/> |
| 5. Waking up at night because you had to urinate?         | <input type="checkbox"/> | <input type="checkbox"/> | <input type="checkbox"/> | <input type="checkbox"/> | <input type="checkbox"/> | <input type="checkbox"/> |
| 6. Urine loss associated with a strong desire to urinate? | <input type="checkbox"/> | <input type="checkbox"/> | <input type="checkbox"/> | <input type="checkbox"/> | <input type="checkbox"/> | <input type="checkbox"/> |

**Patient Global Impression of Improvement, PGI-I**

Have your symptoms changed since the start of the medication (the moment you completed the previous questionnaire)?

|                          |                          |                          |                          |                          |                          |                          |
|--------------------------|--------------------------|--------------------------|--------------------------|--------------------------|--------------------------|--------------------------|
| Very much<br>better      | Much<br>better           | A little better          | No change                | A little<br>worse        | Much<br>worse            | Very much<br>worse       |
| <input type="checkbox"/> | <input type="checkbox"/> | <input type="checkbox"/> | <input type="checkbox"/> | <input type="checkbox"/> | <input type="checkbox"/> | <input type="checkbox"/> |

STROBE Statement—Checklist of items that should be included in reports of *cohort studies*

|                              | Item No | Recommendation                                                                                                                                                                                                                                                                                                         | Page No       |
|------------------------------|---------|------------------------------------------------------------------------------------------------------------------------------------------------------------------------------------------------------------------------------------------------------------------------------------------------------------------------|---------------|
| <b>Title and abstract</b>    | 1       | (a) Indicate the study's design with a commonly used term in the title or the abstract                                                                                                                                                                                                                                 | 2             |
|                              |         | (b) Provide in the abstract an informative and balanced summary of what was done and what was found                                                                                                                                                                                                                    | 2             |
| <b>Introduction</b>          |         |                                                                                                                                                                                                                                                                                                                        |               |
| Background/rationale         | 2       | Explain the scientific background and rationale for the investigation being reported                                                                                                                                                                                                                                   | 4             |
| Objectives                   | 3       | State specific objectives, including any prespecified hypotheses                                                                                                                                                                                                                                                       | 4             |
| <b>Methods</b>               |         |                                                                                                                                                                                                                                                                                                                        |               |
| Study design                 | 4       | Present key elements of study design early in the paper                                                                                                                                                                                                                                                                | 4-5           |
| Setting                      | 5       | Describe the setting, locations, and relevant dates, including periods of recruitment, exposure, follow-up, and data collection                                                                                                                                                                                        | 5             |
| Participants                 | 6       | (a) Give the eligibility criteria, and the sources and methods of selection of participants. Describe methods of follow-up<br>(b) For matched studies, give matching criteria and number of exposed and unexposed                                                                                                      | 5             |
| Variables                    | 7       | Clearly define all outcomes, exposures, predictors, potential confounders, and effect modifiers. Give diagnostic criteria, if applicable                                                                                                                                                                               | 5-6           |
| Data sources/<br>measurement | 8*      | For each variable of interest, give sources of data and details of methods of assessment (measurement). Describe comparability of assessment methods if there is more than one group                                                                                                                                   | 5-6           |
| Bias                         | 9       | Describe any efforts to address potential sources of bias                                                                                                                                                                                                                                                              | 7             |
| Study size                   | 10      | Explain how the study size was arrived at                                                                                                                                                                                                                                                                              | -             |
| Quantitative variables       | 11      | Explain how quantitative variables were handled in the analyses. If applicable, describe which groupings were chosen and why                                                                                                                                                                                           | 6             |
| Statistical methods          | 12      | (a) Describe all statistical methods, including those used to control for confounding<br>(b) Describe any methods used to examine subgroups and interactions<br>(c) Explain how missing data were addressed<br>(d) If applicable, explain how loss to follow-up was addressed<br>(e) Describe any sensitivity analyses | 6-7<br>6<br>7 |
| <b>Results</b>               |         |                                                                                                                                                                                                                                                                                                                        |               |
| Participants                 | 13*     | (a) Report numbers of individuals at each stage of study—eg numbers potentially eligible, examined for eligibility, confirmed eligible, included in the study, completing follow-up, and analysed<br>(b) Give reasons for non-participation at each stage<br>(c) Consider use of a flow diagram                        | 7             |
| Descriptive data             | 14*     | (a) Give characteristics of study participants (eg demographic, clinical, social) and information on exposures and potential confounders<br>(b) Indicate number of participants with missing data for each variable of interest<br>(c) Summarise follow-up time (eg, average and total amount)                         | 8<br>8<br>8   |
| Outcome data                 | 15*     | Report numbers of outcome events or summary measures over time                                                                                                                                                                                                                                                         | -             |

|    |                          |    |                                                                                                                                                                                                              |       |
|----|--------------------------|----|--------------------------------------------------------------------------------------------------------------------------------------------------------------------------------------------------------------|-------|
| 1  | Main results             | 16 | (a) Give unadjusted estimates and, if applicable, confounder-adjusted estimates and their precision (eg, 95% confidence interval). Make clear which confounders were adjusted for and why they were included | 7-11  |
| 2  |                          |    | (b) Report category boundaries when continuous variables were categorized                                                                                                                                    | 7-11  |
| 3  |                          |    | (c) If relevant, consider translating estimates of relative risk into absolute risk for a meaningful time period                                                                                             |       |
| 4  |                          |    |                                                                                                                                                                                                              |       |
| 5  |                          |    |                                                                                                                                                                                                              |       |
| 6  |                          |    |                                                                                                                                                                                                              |       |
| 7  |                          |    |                                                                                                                                                                                                              |       |
| 8  |                          |    |                                                                                                                                                                                                              |       |
| 9  | Other analyses           | 17 | Report other analyses done—eg analyses of subgroups and interactions, and sensitivity analyses                                                                                                               | 7-11  |
| 10 |                          |    |                                                                                                                                                                                                              |       |
| 11 | <b>Discussion</b>        |    |                                                                                                                                                                                                              |       |
| 12 |                          |    |                                                                                                                                                                                                              |       |
| 13 | Key results              | 18 | Summarise key results with reference to study objectives                                                                                                                                                     | 11    |
| 14 | Limitations              | 19 | Discuss limitations of the study, taking into account sources of potential bias or imprecision. Discuss both direction and magnitude of any potential bias                                                   | 13-14 |
| 15 |                          |    |                                                                                                                                                                                                              |       |
| 16 | Interpretation           | 20 | Give a cautious overall interpretation of results considering objectives, limitations, multiplicity of analyses, results from similar studies, and other relevant evidence                                   | 11-14 |
| 17 |                          |    |                                                                                                                                                                                                              |       |
| 18 |                          |    |                                                                                                                                                                                                              |       |
| 19 | Generalisability         | 21 | Discuss the generalisability (external validity) of the study results                                                                                                                                        | 11    |
| 20 |                          |    |                                                                                                                                                                                                              |       |
| 21 | <b>Other information</b> |    |                                                                                                                                                                                                              |       |
| 22 | Funding                  | 22 | Give the source of funding and the role of the funders for the present study and, if applicable, for the original study on which the present article is based                                                | 3     |
| 23 |                          |    |                                                                                                                                                                                                              |       |
| 24 |                          |    |                                                                                                                                                                                                              |       |

\*Give information separately for exposed and unexposed groups.

**Note:** An Explanation and Elaboration article discusses each checklist item and gives methodological background and published examples of transparent reporting. The STROBE checklist is best used in conjunction with this article (freely available on the Web sites of PLoS Medicine at <http://www.plosmedicine.org/>, Annals of Internal Medicine at <http://www.annals.org/>, and Epidemiology at <http://www.epidem.com/>). Information on the STROBE Initiative is available at <http://www.strobe-statement.org>.

# BMJ Open

## Determining the minimal important differences in the International Prostate Symptom Score and Overactive Bladder Questionnaire: results from an observational cohort study in Dutch primary care

|                                 |                                                                                                                                                                                                                                                                                                                                                                                                                                                                                                                                                                                                                                                                                                                                                                                                                                                          |
|---------------------------------|----------------------------------------------------------------------------------------------------------------------------------------------------------------------------------------------------------------------------------------------------------------------------------------------------------------------------------------------------------------------------------------------------------------------------------------------------------------------------------------------------------------------------------------------------------------------------------------------------------------------------------------------------------------------------------------------------------------------------------------------------------------------------------------------------------------------------------------------------------|
| Journal:                        | <i>BMJ Open</i>                                                                                                                                                                                                                                                                                                                                                                                                                                                                                                                                                                                                                                                                                                                                                                                                                                          |
| Manuscript ID                   | bmjopen-2019-032795.R2                                                                                                                                                                                                                                                                                                                                                                                                                                                                                                                                                                                                                                                                                                                                                                                                                                   |
| Article Type:                   | Original research                                                                                                                                                                                                                                                                                                                                                                                                                                                                                                                                                                                                                                                                                                                                                                                                                                        |
| Date Submitted by the Author:   | 25-Nov-2019                                                                                                                                                                                                                                                                                                                                                                                                                                                                                                                                                                                                                                                                                                                                                                                                                                              |
| Complete List of Authors:       | Blanker, Marco; University of Groningen, University Medical Center Groningen, department of General Practice and Elderly Care Medicine<br>Alma, Harma; University of Groningen, University Medical Center Groningen, Department of General Practice and Elderly Care Medicine;<br>University of Groningen, University Medical Center Groningen, Groningen Research Institute for Asthma and COPD (GRIAC)<br>Devji, Tahira; McMaster University Faculty of Health Sciences, Clinical Epidemiology and Biostatistics<br>Roelofs, Marjan; University of Groningen, University Medical Center Groningen, department of General Practice and Elderly Care Medicine<br>Steffens, Martijn ; Isala Hospitals, urology<br>van der Worp, Henk; University of Groningen, University medical center groningen, Department General Practice and Elderly Care Medicine |
| <b>Primary Subject Heading</b>: | General practice / Family practice                                                                                                                                                                                                                                                                                                                                                                                                                                                                                                                                                                                                                                                                                                                                                                                                                       |
| Secondary Subject Heading:      | Urology, Epidemiology                                                                                                                                                                                                                                                                                                                                                                                                                                                                                                                                                                                                                                                                                                                                                                                                                                    |
| Keywords:                       | Lower Urinary Tract Symptoms, Adrenergic alpha-Antagonists, Primary Health Care, Minimal Clinically Important Difference, Patient outcome assessment                                                                                                                                                                                                                                                                                                                                                                                                                                                                                                                                                                                                                                                                                                     |
|                                 |                                                                                                                                                                                                                                                                                                                                                                                                                                                                                                                                                                                                                                                                                                                                                                                                                                                          |

SCHOLARONE™  
Manuscripts

1  
2  
3 **Determining the minimal important differences in the International Prostate**  
4  
5 **Symptom Score and Overactive Bladder Questionnaire: results from an**  
6  
7 **observational cohort study in Dutch primary care**  
8  
9

10  
11  
12 M.H. (Marco) Blanker<sup>1</sup>, H.J. (Harma) Alma<sup>1</sup>, T. (Tahira) Devji<sup>2</sup>, M. (Marjan) Roelofs<sup>1</sup>, M.G.  
13  
14 (Martijn) Steffens<sup>3</sup>, H. (Henk) van der Worp<sup>1</sup>  
15  
16

- 17  
18  
19 1. Department of General Practice and Elderly Care Medicine, University Medical Centre  
20  
21 Groningen, University of Groningen  
22  
23 2. Department of Health Research Methods, Evidence and Impact, McMaster University,  
24  
25 Canada  
26  
27 3. Department of Urology, Isala Clinics, Zwolle, The Netherlands  
28  
29  
30

31  
32 Corresponding author: Marco H. Blanker, MD PhD, general practitioner and epidemiologist,  
33  
34 Department of General Practice and Elderly Care Medicine, University Medical Centre  
35  
36 Groningen, University of Groningen, P.O. box 196, 9700 AD Groningen, The Netherlands, Phone:  
37  
38 +31 6 14961542, Fax: +31 50 3632964  
39  
40

41  
42 E-mail addresses: [m.h.blanker@umcg.nl](mailto:m.h.blanker@umcg.nl), [h.j.alma@umcg.nl](mailto:h.j.alma@umcg.nl), [devjits@mcmaster.ca](mailto:devjits@mcmaster.ca),  
43  
44 [marjanroelofs@hotmail.com](mailto:marjanroelofs@hotmail.com), [m.steffens@isala.nl](mailto:m.steffens@isala.nl), [h.van.der.worp@umcg.nl](mailto:h.van.der.worp@umcg.nl)  
45  
46

47  
48 **Wordcount:** 3,116

49  
50 **Keywords:** Lower Urinary Tract Symptoms; Adrenergic alpha-Antagonists; Primary  
51  
52 Health Care; Minimal Clinically Important Difference; Patient outcome assessment  
53  
54  
55  
56  
57  
58  
59  
60

## ABSTRACT

**Objectives:** To determine the minimal important difference (MID) of the International Prostate Symptom Score (IPSS) and the Overactive Bladder Questionnaire short form (OAB-q SF) assessed in primary care among patients treated for lower urinary tract symptoms (LUTS).

**Design:** Single-arm, open-label observational cohort study with a 6-week follow-up.

**Setting:** Twenty-two pharmacies in the Netherlands.

**Participants:** We enrolled Dutch men with uncomplicated LUTS who received a new alpha-blocker prescription from their general practitioner or urologist.

**Primary and secondary outcomes:** The IPSS and OAB-q SF were completed before and after 6 weeks of therapy. At 6 weeks, men also completed the Patient Global Impression of Improvement (PGI-I). The mean change scores of the IPSS and OAB-q SF were calculated for each PGI-I outcome category, with the category 'a little better' used to determine the MID. The standard error of measurement (SEM) was calculated for each questionnaire.

**Results:** In total, 165 men completed follow-up. The MID was 5.2 points (95%CI, 3.9–6.4; SEM 3.6) for the IPSS and 11.0 points (95%CI, 7.1–14.9; SEM 9.7) for the OAB-q SF. For both questionnaires, confidence intervals showed an overlap with the no-change categories. However, the MID for the IPSS was higher in men with severe baseline symptoms (7.1; 95%CI, 5.3–9.0) than in men with moderate baseline symptoms (3.2; 95%CI, 1.7–4.8).

**Conclusion:** In this study, the MID for the IPSS was considerably higher than the MID of 3.1 reported in the only other study on this topic, but may be due to methodological differences. Interpretation of the MID for the OAB-q SF is hampered by the overlap with the SEM. Future studies are needed to confirm our results because correlations between the PGI-I and symptom questionnaires were suboptimal.

## ARTICLE SUMMARY

### Strengths and limitations of this study:

- We assessed the minimal important difference (MID) of two frequently used questionnaires



1  
2  
3 on lower urinary tract symptoms.  
4

- 5 • Given that many men are treated in primary care, MID values for this setting are  
6 particularly important to inform evidence-based decision-making and to facilitate  
7 interpretation of the IPSS and OAB-q SF.  
8  
9
- 10 • Notably, the sample size of this study was small, which resulted in very low numbers of  
11 men being included in the PGI-I category 'very much better' or 'worsening of symptoms',  
12 and may clarify the small overlap of the confidence intervals with the no-change category.  
13  
14  
15  
16  
17  
18  
19

20 **Funding statement:** The Hein Hogerzeil Foundation supported this work with an unrestricted  
21 grant. The Foundation was not involved in the design of this study, nor in the data collection,  
22 data analyses, interpretation of the outcomes, or the writing of this manuscript.  
23  
24  
25  
26  
27  
28

29 **Conflict of interest statement:** All authors have completed the ICMJE uniform disclosure form  
30 at [www.icmje.org/coi\\_disclosure.pdf](http://www.icmje.org/coi_disclosure.pdf) and declare: no support from any organisation for the  
31 submitted work; no financial relationships with any organisations that might have an interest in  
32 the submitted work in the previous three years; no other relationships or activities that could  
33 appear to have influenced the submitted work.  
34  
35  
36  
37  
38  
39  
40  
41  
42  
43  
44  
45  
46  
47  
48  
49  
50  
51  
52  
53  
54  
55  
56  
57  
58  
59  
60

## INTRODUCTION

Symptom severity is a key outcome for patients with lower urinary tract symptoms (LUTS) and is most often evaluated by direct patient inquiry, using patient-reported outcome measures (PROMs). Although the IPSS is most often used for this purpose in both clinical trials and practice,<sup>1-5</sup> it fails to capture problematic symptoms such as urinary incontinence and urgency. Therefore, the Overactive Bladder Questionnaire (OAB-q) is increasingly being used to evaluate the treatment of overactive bladder,<sup>6,7</sup> with the short form (i.e., OAB-q SF) having the advantage of being less time consuming.<sup>8</sup> Together, both of the IPSS and OAB-q SF capture the spectrum of outcomes that are important to patients, but it is difficult to interpret the effects of an intervention expressed as mean scores or change scores over time.

The minimal important difference (MID) has proven invaluable when interpreting PROMs and could be of great value for both the IPSS and OAB-q SF.<sup>9,10</sup> To date, the MID has only been reported for the IPSS in a study conducted in secondary care among participants of clinical trials.<sup>1,2</sup> There has been no report of the MID for the OAB-q SF in any care setting. In countries like the Netherlands and the United Kingdom, most men with LUTS first visit their GP to seek treatment. Given that setting may affect the MID, possibly because of differences in baseline symptom severity,<sup>9-11</sup> we feel that it is important to assess the MID in a primary care setting. To date the MID for secondary care settings has been applied in guidelines for primary care.<sup>3,5</sup> It is unclear if applying the threshold for a clinically relevant outcome is appropriate. Men who receive treatment need to be aware of what can be expected. Knowledge about the MID in primary care will then provide invaluable data for interpreting treatment outcomes that may differ between primary and secondary care. In addition, evidence must be obtained from multiple studies to ensure that MID determinations are accurate.

In the current study, we aimed to determine the MIDs for both the IPSS and OAB-q SF in a patient cohort originating mainly from primary care.

## METHODS

## Study design

We conducted a prospective cohort study between January 2016 and April 2018.<sup>12</sup> Baseline data for the IPSS and OAB-q SF were compared with follow-up data after 6 weeks of treatment.

At follow-up, participants also completed the Patient Global Impression of Improvement (PGI-I) and we calculated the MID.

## Participants

Adult men who visited a participating pharmacy in the north of the Netherlands were included if they received a new alpha-blocker prescription for uncomplicated LUTS from a GP or urologist. A prescription was defined as new if no alpha-blocker prescription had been given within the past year. The pharmacists checked if the alpha-blocker was indicated for LUTS and excluded men prescribed alpha-blockers for urinary tract stones or indwelling catheters. All participants provided written informed consent. The medical ethics committee of the University Medical Centre Groningen, the Netherlands, approved the study (number 2016.122).

## Data collection

At baseline, before starting alpha-blocker therapy, all participants provided relevant descriptive data (e.g., age, duration of LUTS in months or years, and history of surgery for LUTS) and completed the Dutch versions of the IPSS and OAB-q SF. After 6 weeks, men who consented repeated the IPSS and OAB-q SF by postal invitation. At this time, we asked participants to complete the Patient Global Impression of Improvement (PGI-I) questionnaire.<sup>13</sup> The period of six weeks was chosen as clinical effects of alpha-blockers take a few weeks to develop fully, but significant efficacy over placebo can occur within hours to days.<sup>4,14</sup>

## Questionnaires

The IPSS questionnaire was originally validated as the *American Urological Association Symptom Index for benign prostatic hyperplasia*.<sup>1</sup> It includes 7 questions covering frequency, nocturia, weak urinary stream, hesitancy, intermittence, incomplete emptying and urgency. Each question has response options ranging from 0 to five, with higher scores reflecting more severe symptoms. Total scores that may range from 0 (no symptoms) to 35 points (maximum score),

1  
2  
3 and scores are often categorized as no/mild symptoms (0–7 points), moderate symptoms (8–19  
4 points), or severe symptoms ( $\geq 20$  points). The questionnaire was internally consistent  
5  
6 (Cronbach's alpha = 0.86) and has excellent test-retest reliability ( $r = 0.92$ ).<sup>1</sup> The MID for the  
7  
8 IPSS is currently considered to be 3.1 points.<sup>2</sup> The AUA-SI has been internationally adopted and  
9  
10 implemented worldwide under the name IPSS.  
11

12  
13 IPSS focuses on the concept of “benign prostatic hyperplasia” as cause of male LUTS, which  
14  
15 appeared to have a multifactorial origin. Overactive bladder (OAB) is one of the alternative  
16  
17 explanations of LUTS. Although urgency (included in the IPSS) relates to OAB, OAB includes  
18  
19 other symptoms as well, which are not included in the IPSS questionnaire. Therefor, Coyne et al  
20  
21 developed a condition specific questionnaire, the OAB-q.<sup>6,7</sup> The OAB-q was developed from  
22  
23 focus groups of men and women, clinician opinion, and a thorough literature review. More  
24  
25 recently, this OAB-q has been shortened to benefit patients, researchers and clinicians.<sup>8</sup> The  
26  
27 OAB-q SF contains six questions on 6-point Likert-type scales, with the outcomes transformed  
28  
29 to a 0–100 point scale in which higher scores indicate more severe symptoms.<sup>8</sup> This scale  
30  
31 demonstrated good convergent validity, discriminant validity, internal reliability,  
32  
33 reproducibility, and responsiveness to change.<sup>8</sup>  
34  
35

36  
37 Both IPSS and OAB-q-SF capture symptoms that are not by definition patient important, but  
38  
39 rather reflect the conditions under study. To study if changes on a questionnaire over time are  
40  
41 relevant for patients, the PGI-I has been developed using a quantitative approach.<sup>13,15</sup>  
42  
43

44 The PGI-I is a validated generic tool for assessing overall improvement after treatment and is  
45  
46 answered on a 7-point Likert-type scale, with the following options: ‘very much better’, ‘much  
47  
48 better’, ‘a little better’, ‘no change’, ‘a little worse’, ‘much worse’ or ‘very much worse’.<sup>13,15</sup> Full  
49  
50 versions of these questionnaires are presented as supplementary file 1.  
51

52 We sent a reminder after two weeks to patients who did not respond to follow-up requests.  
53

#### 54 **Data analyses**

55  
56 Baseline characteristics are reported as continuous variables and summarized as mean and SD  
57  
58 or as median and interquartile range, depending on the distribution checked by the Shapiro–  
59  
60

1  
2  
3 Wilk test. These characteristics were also compared between men with and without completed  
4 follow-up data to test for selective nonresponse. Next, the change scores of the IPSS and OAB-q  
5 SF were calculated by comparing the data between the baseline and follow-up questionnaires.  
6  
7 Change scores were inverted to facilitate intuitive interpretation, with positive scores reflecting  
8 symptom improvement.  
9  
10  
11  
12

13  
14 Various methods exist to determine the MID of questionnaires and are typically either  
15 anchor-based or distribution-based.<sup>9, 16-18</sup> The latter involve evaluating change in the PROM  
16 with the probability that the change occurred by chance, sample variation or measurement  
17 precision; however, they do not reflect patient perspectives.<sup>17, 19</sup> Thus, we used an anchor-  
18 based method,<sup>9</sup> in which we compared changes in the IPSS or OAB-q SF (PROM) with the PGI-I  
19 (the anchor). For each PGI-I category, we then present the mean change in scores from baseline  
20 to follow-up with the associated CIs. We defined the MID as the mean change in IPSS or OAB-q  
21 SF for the PGI-I category 'a little better', as the M in MID reflects the *minimal* change that is  
22 considered relevant. We also present the mean change scores for the other PGI-I categories.  
23  
24  
25  
26  
27  
28  
29  
30  
31  
32

33 The usefulness of anchor-based approaches depends on the relationship between the  
34 PROM and the anchor.<sup>20-22</sup> The anchor and PROM should be measuring the same or similar  
35 underlying constructs and should therefore be appreciably correlated. Correlations between  
36 questionnaire change scores and the anchor PGI-I should be obviously strong, as else these  
37 measure different concepts. Correlations between the anchor PGI-I and the baseline and follow-  
38 up questionnaire scores are performed to check for a possible response shift. Mostly anchor  
39 PGI-I scores seem correlated with follow-up scores (due to response shift). We therefore  
40 examined the Spearman correlation coefficients between the PGI-I and the IPSS and OAB-q SF  
41 for the baseline, follow-up and change data to ensure the anchor's validity. A correlation  
42 coefficient between the symptom change scores and the PGI-I of  $\geq 0.50$ , and an equal and  
43 opposite correlation of the PGI-I with the baseline score and the follow-up score, were  
44 considered ideal and likely to yield trustworthy MID estimates.<sup>20-22</sup>  
45  
46  
47  
48  
49  
50  
51  
52  
53  
54  
55  
56  
57  
58

59 To test the impact of baseline symptom severity on the distribution of results, a  
60

1  
2  
3 stratified analysis was performed for the IPSS categories ‘moderate symptoms’ and ‘severe  
4 symptoms’ because previous research has shown that such stratification has a large impact.<sup>2</sup>  
5  
6 No such categories have been defined for the OAB-q SF, so we did not perform a similar analysis  
7  
8 for this questionnaire. Subgroup analyses were also performed with participants who received  
9  
10 their prescription from their GP, allowing us to provide data that focused on the primary care  
11  
12 setting. Finally, we checked if the MID exceeded the measurement error.<sup>15,17</sup> For this, we  
13  
14 calculated the standard error of measurement (SEM) as follows:  $[SD \times (1 - \text{reliability})^{1/2}]$ .  
15  
16 Cronbach’s alpha was used as the reliability measure.<sup>23</sup>  
17  
18  
19

20 The complete data set was used without imputing missing data. All analyses were  
21  
22 performed using IBM SPSS version 25.0 (IBM Corp., Armonk, NY, USA), and we considered a p-  
23  
24 value <0.05 to be statistically significant.  
25

### 26 **Patient and public involvement**

27 This study was performed without patient involvement. We did not invite patients to comment  
28  
29 on the study design nor did we consult them to interpret the results. Patients were not invited  
30  
31 to contribute to the writing or editing of this document for readability or accuracy.  
32  
33  
34  
35

## 36 **RESULTS**

37 A total of 251 men completed the baseline questionnaires, of which 165 also completed the  
38  
39 follow-up questionnaires. The baseline characteristics of men with and without follow-up data  
40  
41 are shown in Table 1, with no statistically significant differences found between these groups.  
42  
43 Notably, 86.3% of the participants received their prescription from a GP and the remainder  
44  
45 received it from a urologist.  
46  
47  
48  
49

50 **Table 1.** Baseline characteristics of all participants and participants who dropped out after the  
51  
52 baseline questionnaire

|  | Participants with | Drop out after baseline | p-value |
|--|-------------------|-------------------------|---------|
|  | completed         | (n = 86)                |         |
|  | follow-up         |                         |         |

|                                           | (n = 165)       |                 |       |
|-------------------------------------------|-----------------|-----------------|-------|
| Age (mean ± SD)                           | 66.7±9.7        | 65.4±12.1       | 0.42* |
| Prescription from GP (%)                  | 86.3            | 83.2            | 0.55# |
| IPSS score (mean ± SD)                    | 19.1±6.8        | 17.6±6.5        | 0.11* |
| IPSS categories (%)                       |                 |                 | 0.12# |
| - none/mild                               | 3.7             | 6.4             |       |
| - moderate                                | 50.9            | 61.5            |       |
| - severe                                  | 45.3            | 32.1            |       |
| IPSS Quality of Life (median   IQR)       | 4.0   3.0-5.0   | 4.0   3.0-5.0   | 0.52§ |
| OAB-q SF (mean ± SD)                      | 39.8±19.2       | 40.7±18.1       | 0.70* |
| Duration of LUTS in months (median   IQR) | 24.0   5.0-42.0 | 12.0   3.0-36.0 | 0.11§ |
| History of surgery for LUTS (%)           | 1.2             | 3.8             | 0.19# |

IQR: interquartile range. P-values refer to: \* student-t-test; # chi-squared test; § Mann-Whitney U test.

Abbreviations: OAB-q SF, Overactive Bladder Questionnaire short form.

There were mean improvements in the IPSS and OAB-q SF scores during the study of 5.8 (SD 6.7) and 11.8 points (SD 17.4), respectively. Between baseline and follow-up at 6 weeks, the mean IPSS score changed from 19.1 (SD 6.8) to 13.3 (SD 6.5) and the mean OAB-q SF score changed from 39.7 (SD 19.2) to 27.9 (SD 16.9). The PGI-I outcomes are shown in Table 2 and indicate that most men reported that they were 'a little better' or 'much better' (74.7%), whilst only 23.5% perceived no change. Only three men (1.8%) reported 'worsened' symptoms, and none of the participants reported 'much worsened' or 'very much worsened' symptoms.

**Table 2.** Change scores for the IPSS and OAB-q SF by PGI-I outcomes

| PGI-I outcome    | N (%)     | IPSS            | Missing | OAB-q SF         | Missing |
|------------------|-----------|-----------------|---------|------------------|---------|
| Very much better | 6 (3.6)   | 13.4 (2.9;23.9) | 1       | 23.8 (2.3;45.3)  | 0       |
| Much better      | 50 (30.3) | 8.7 (6.8;10.7)  | 2       | 19.1 (14.3;24.0) | 3       |

|                        |                  |                      |          |                        |          |
|------------------------|------------------|----------------------|----------|------------------------|----------|
| <b>A little better</b> | <b>68 (41.2)</b> | <b>5.2 (3.9;6.4)</b> | <b>3</b> | <b>11.0 (7.1;14.9)</b> | <b>4</b> |
| No change              | 38 (23.0)        | 3.1 (1.1;5.1)        | 0        | 3.0 (-2.3;8.4)         | 4        |
| A little worse         | 3 (1.8)          | -5.0 (-30.9;20.9)    | 0        | -9.7 (-81.7;62.4)      | 0        |

Change in IPSS and OAB-q SF scores were estimated by comparing symptom scores between baseline and 6 weeks. Mean change and 95% CIs are presented. Outcomes are inverted so that positive changes reflect symptom improvement. The PGI-I category 'a little better' reflects the MID for both questionnaires. None of the participants scored 'much worsened' or 'very much worsened' on the PGI-I. Abbreviations: MID, Minimal important difference; OAB-q SF, Overactive Bladder Questionnaire short form; PGI-I, Patient Global Impression of Improvement.

Table 2 also shows the distribution of changes in the IPSS and OAB-q SF for each PGI-I category. The MID for the IPSS was 5.2 points (95% CI, 3.9–6.4) and the PGI-I outcomes 'no change' and 'much better' corresponded to IPSS symptom changes of 3.1 points (95% CI, 1.1–5.1) and 8.7 points (95% CI, 6.8–10.7), respectively. The MID for the OAB-q SF was 11.0 points (95% CI, 7.1 to 14.9) and the PGI-I outcomes 'no change' and 'much better' corresponded with mean improvements of 3.0 points (95% CI, -2.3 to 8.4) and 19.1 points (95% CI, 14.3–24.0), respectively. For both questionnaires, the confidence intervals of the MID-categories showed an overlap with the 'no change' categories.

The Spearman correlation coefficients were then calculated between the PGI-I and both the IPSS and the OAB-q SF. The correlation was -0.51 for the PGI-I and baseline IPSS, 0.43 for the PGI-I and follow-up IPSS and 0.38 for the PGI-I and change in IPSS. The corresponding correlations for the OAB-q SF were -0.09 at baseline, 0.36 at follow-up and 0.42 for the change.

**Table 3.** Change scores for the IPSS and OAB-q SF by PGI-I outcomes: subgroup analysis for GP prescriptions

| <b>PGI-I outcome</b> | <b>N (%)</b> | <b>IPSS</b> | <b>Missing</b> | <b>OAB-q SF</b> | <b>Missing</b> |
|----------------------|--------------|-------------|----------------|-----------------|----------------|
|----------------------|--------------|-------------|----------------|-----------------|----------------|



|                        |                  |                      |          |                        |          |
|------------------------|------------------|----------------------|----------|------------------------|----------|
| Very much better       | 4 (3.1)          | 18.0 (1.7;34.3)      | 1        | 30.8 (-0.9;62.4)       | 0        |
| Much better            | 39 (30.2)        | 9.2 (7.0;11.5)       | 2        | 19.9 (14.8;24.9)       | 2        |
| <b>A little better</b> | <b>57 (44.2)</b> | <b>5.4 (4.0;6.7)</b> | <b>3</b> | <b>11.2 (7.0;15.4)</b> | <b>3</b> |
| No change              | 27 (20.9)        | 3.1 (0.5;5.6)        | 0        | 3.3 (-3.4;9.9)         | 3        |
| A little worse         | 2 (1.6)          | -8.5 (-11.6.5; 99.5) | 0        | -16.5 (-353.2;320.2)   | 0        |

Change in IPSS and OAB-q SF scores were estimated by comparing symptom scores between baseline and 6 weeks. Mean change and 95% CIs are presented. Outcomes are inverted so that positive changes reflect symptom improvement. The PGI-I category 'a little better' reflects the MID for both questionnaires. None of the participants scored 'much worsened' or 'very much worsened' on the PGI-I. Abbreviations: MID, Minimal important difference; OAB-q SF, Overactive Bladder Questionnaire short form; PGI-I, Patient Global Impression of Improvement.

Subgroup analyses of data for men with a prescription from a GP found no relevant differences, with MID values of 5.4 for the IPSS and 11.2 for the OAB-q SF (Table 3). Stratified analysis of baseline data revealed that men with severe symptoms had higher MID values for the IPSS, reaching 7.1 (95% CI, 5.3–9.0), compared with the MID value of 3.2 (95% CI, 1.7–4.8) for men with moderate symptoms (Table 4).

**Table 4.** Change scores for the IPSS by PGI-I outcomes

| PGI-I outcome          | Moderate symptoms (n = 88) |                      |          | Severe symptoms (n = 73) |                      |
|------------------------|----------------------------|----------------------|----------|--------------------------|----------------------|
|                        | N (%)                      | Change               | Missing  | N (%)                    | Change               |
| Very much better       | 3 (3.4)                    | 6.5 (-50.7;63.7)     | 1        | 3 (4.1)                  | 18 (1.7;34.3)        |
| Much better            | 30 (34.1)                  | 5.6 (3.7;7.5)        | 1        | 19 (26.0)                | 13.5 (10.5;16.5)     |
| <b>A little better</b> | <b>33 (37.5)</b>           | <b>3.2 (1.7;4.8)</b> | <b>0</b> | <b>32 (43.8)</b>         | <b>7.1 (5.3;9.0)</b> |
| No change              | 19 (21.6)                  | 1.3 (-1.7;4.3)       | 0        | 19 (26.0)                | 4.9 (2.3;7.6)        |
| A little worse         | 3 (3.4)                    | -5.0 (-31.0;20.9)    | 0        | 0 (0.0)                  | -                    |

These results are stratified by baseline symptom severity on the IPSS: moderate symptoms are scores of 8–19 and severe symptoms are scores of  $\geq 20$ . Change in IPSS scores were estimated by comparing

1  
2  
3 symptom scores between baseline and 6 weeks. Mean change and 95% CIs are presented. Outcomes are  
4 inverted so that positive changes reflect symptom improvement. The PGI-I category 'a little better'  
5 reflects the MID for both questionnaires. None of the participants scored 'much worsened' or 'very much  
6 worsened' on the PGI-I. Abbreviations: MID, Minimal important difference; OAB-q SF, Overactive Bladder  
7 Questionnaire short form; PGI-I, Patient Global Impression of Improvement.  
8  
9  
10  
11  
12

---

13  
14  
15 Finally, the SEM was 3.6 for the IPSS and 9.7 for the OAB-q SF.  
16  
17

## 18 19 **DISCUSSION**

20  
21 We estimated the MID for two questionnaires that are often used to assess male LUTS in  
22 primary care. However, whereas the SEM of the IPSS was less than the 95% CI of the MID (5.2  
23 points; 95% CI, 3.9–6.4; SEM 3.6), the SEM of the OAB-q SF fell within the 95% CI of the MID (11  
24 points; 95% CI, 7.1–14.9; SEM 9.7). Thus, we can only conclude that the outcomes for the IPSS  
25 were unlikely to have occurred because of chance or measurement imprecision. Given that  
26 many questionnaires have used multiple MID values, we were surprised to find only one  
27 previous estimate of the MID for the IPSS in the literature.<sup>1,2</sup> Our study therefore adds relevant  
28 information in the primary care setting for clinicians and guideline developers.  
29  
30  
31  
32  
33  
34  
35  
36  
37

38  
39 Our results for the IPSS were different to those of the seminal study on this topic  
40 performed by Barry et al. in secondary care.<sup>1,2</sup> In that study, the MID of 3.1 points (SD 0.27) fell  
41 within the 95% CI of the 'no change' group (consisting of men who expressed that they hadn't  
42 experienced any change in symptoms), but outside the CI of the 'a little better' group, suggesting  
43 a likely underestimation of the real value. In the current study, there was also some overlap  
44 between the CIs of the 'no change' and the 'a little better' group, though this was within a change  
45 of only 3.9 to 5.1 points. This could be explained by the relative small samples in the subgroup  
46 analyses. Given that treatment is typically in primary care, we have therefore provided  
47 additional data that is applicable to most men with LUTS. Nevertheless, the differences in  
48 outcomes compared with the study by Barry et al. need to be explained. It is our contention that  
49 three methodological differences account for these differences.  
50  
51  
52  
53  
54  
55  
56  
57  
58  
59  
60

1  
2  
3 First, Barry et al. compared patients between baseline and follow-up after 13 weeks. By  
4 contrast, the follow-up period in the current study was only 6 weeks. Although this difference of  
5 7 weeks may have affected the ability of patients to recall their prior health state accurately, the  
6 true impact of this remains unclear. Change scores may also have been influenced by the natural  
7 variation that occurs in symptom severity over time.  
8  
9

10  
11  
12  
13  
14 Second, in the research by Barry et al., a different global assessment of patient  
15 improvement was used. This included a 5-point scale with the options 'marked improvement',  
16 'moderate improvement', 'slight improvement', 'no improvement', and 'worse' for which the  
17 exact question was not reported. In our study, we used a 7-point Likert-type scale that ranged  
18 from 'very much better' to 'very much worsened'. We considered that this difference probably  
19 had no more than a marginal impact given that the positive outcome categories were  
20 comparable in both studies. Notably, none of the participants in our study reported that the  
21 symptoms had 'very' or 'very much' worsened.  
22  
23  
24  
25  
26  
27  
28  
29

30  
31 Third, we mainly included men from primary care, rather than men solely from  
32 secondary care. Although it is generally thought that men in primary care have fewer symptoms,  
33 our men tended to have more severe symptoms (IPSS score >19) than in the study by Barry et  
34 al. (45% versus 25%). Barry et al. also reported that baseline severity had a major impact on the  
35 MID, but when we compare their stratified analysis with ours, we had higher mean change  
36 scores for each PGI-I category. This might be explained by the fact that we only included men  
37 who actually used an alpha-blocker. In contrast to this focused approach, Barry et al. used data  
38 for all participants in a large, randomized, double-blind trial of four treatment strategies for  
39 male LUTS. In their study, a lower MID could therefore have resulted from the inclusion of  
40 patients receiving placebo, finasteride, terazosin or combination therapy given that the efficacy  
41 of alpha-blockers exceeds that of both placebo and finasteride. The use of blinding meant that  
42 men who used placebo or finasteride may have overestimated their subjective improvement,  
43 whilst alpha-blocker users may have underestimated their subjective improvement. Given that  
44 the IPSS objectively counts symptoms, the placebo and finasteride users would experience a  
45  
46  
47  
48  
49  
50  
51  
52  
53  
54  
55  
56  
57  
58  
59  
60

1  
2  
3 smaller change in the IPSS whereas the active drug users would experience a larger effect.

4  
5 Although the actual impact of each intervention is unknown, researchers in other fields have  
6  
7 made similar observations.<sup>10, 11, 24</sup>

8  
9 We were unable to find any prior estimates of the MID for the OAB-q SF in the literature.  
10  
11 Our finding that 11.0 points (95% CI, 7.1–14.9) indicates a clinically relevant change is therefore  
12  
13 a novel and important finding, but one for which the reliability will need to be assessed in other  
14  
15 studies. We recognize that alpha-blockers are not specifically indicated for the treatment of  
16  
17 overactive bladder, but we contend that there is a considerable overlap with LUTS unrelated to  
18  
19 overactive bladder. Indeed, guidelines suggest prescribing alpha-blockers for most men with  
20  
21 LUTS who request active treatment. This is because these agents have a rapid onset of action,  
22  
23 good efficacy, and low rate and severity of adverse events.<sup>3-5</sup> We recommend further study to  
24  
25 determine the MID in men with specific symptoms of overactive bladder treated with  
26  
27 anticholinergics or beta-3 agonists.  
28  
29

30  
31 Some limitations need to be considered when assessing our results. Notably, the sample  
32  
33 size of this study was small, which resulted in very low numbers of men being included in the  
34  
35 PGI-I category 'very much better'. For that category, the mean change scores for both  
36  
37 questionnaires showed very wide CIs. The same holds for the categories linked to symptom  
38  
39 worsening. In those categories, a discontinuation trial, in which men stop their treatment, may  
40  
41 be more suitable for reliable estimates. The sample size might also explain why the CI of the  
42  
43 MID estimate for the OAB-q SF included the SEM.  
44  
45

46  
47 Another limitation is reflected by difficulties we encountered with some of the  
48  
49 associations between the PGI-I and the two PROM questionnaires. For the IPSS, the follow-up  
50  
51 IPSS and PGI-I scores correlated better than with IPSS change and PGI-I scores, suggesting that  
52  
53 this rating only reflected the current status, which in turn, decreases confidence in the MID  
54  
55 estimate. For the OAB-q SF, the correlation coefficient between the baseline OAB-q SF and PGI-I  
56  
57 scores was opposite in magnitude to that for the follow-up OAB-q SF and PGI-I scores. With both  
58  
59 questionnaires, the correlation coefficients for the change scores were lower than the threshold  
60

1  
2  
3 of 0.5 that we set a priori.<sup>21</sup> High correlation coefficients are preferred between the anchor and  
4 the change in PROM, though some researchers have suggested applying lower thresholds.<sup>25</sup>  
5  
6 Still, even the high correlation coefficients are insufficient to confirm that the transition rating is  
7 in fact measuring change as opposed to current health status.<sup>21</sup> Unfortunately, Barry et al. did  
8 not report the correlation coefficients between the IPSS and the anchor,<sup>2</sup> which is consistent  
9 with most other research for PROMs.<sup>26</sup> Given the suboptimal relationship between the PROM  
10 and the anchor, we must stress that the estimates obtained for the MID should be interpreted  
11 with caution and should be confirmed in future investigations with larger samples.  
12  
13  
14  
15  
16  
17  
18  
19

20 In conclusion, this study is the first to define MID values for two important PROMs used  
21 to evaluate the effectiveness of treatment for male LUTS in primary care. Given that many men  
22 are treated in primary care, MID values for this setting are particularly important to inform  
23 evidence-based decision-making and to facilitate interpretation of the IPSS and OAB-q SF.  
24 Moreover, we consider that this study emphasizes the importance of the MID to individual  
25 patients in daily practice. We defined the MID based on the PGI-I outcome 'a little better' in the  
26 present study, but patients may expect 'much better' as an outcome when starting therapy. To  
27 date, most outcomes of alpha-blocker and other drug treatments for male LUTS have been  
28 expressed as the mean IPSS change scores. In the vast majority of studies<sup>3</sup>, difference in IPSS  
29 changes between active treatment and placebo have approached, but not exceeded, the  
30 previously reported MID of 3.1.<sup>1,2</sup> Applying a threshold for improvement of 5.2 points, as  
31 described in our study, may change the interpretation of those studies.  
32  
33  
34  
35  
36  
37  
38  
39  
40  
41  
42  
43  
44  
45  
46  
47

### 48 **Acknowledgements**

49 We are grateful for the assistance of Tom Vermist in collecting the data. The authors thank all  
50 patients and collaborating pharmacies for their participation, as well as Dr Robert Sykes  
51 (www.doctored.org.uk) for providing editorial services.  
52  
53  
54  
55

### 56 **Author contributions**

57 The corresponding author attests that all listed authors meet authorship criteria and that no  
58  
59  
60

1  
2  
3 others meeting the criteria have been omitted.

4  
5 MHB and MGS initiated the study. Acquisition of the data was done by MHB and MR. Analysis  
6  
7 and interpretation of the data was done by MHB, HJA, TD and HW. MHB wrote the manuscript  
8  
9 with extensive support from HJA and TD.

10  
11 All authors critically reviewed the manuscript.

### 12 13 **Data sharing statement**

14  
15  
16 Data collected for this study will be available from the corresponding author upon request.

### 17 18 19 **REFERENCES**

20  
21  
22  
23 1 Barry MJ, Fowler FJ, Jr, O'Leary MP, et al. The American Urological Association symptom index  
24 for benign prostatic hyperplasia. The Measurement Committee of the American Urological  
25 Association. *J Urol* 1992;148:1549,57; discussion 1564.

26  
27 2 Barry MJ, Williford WO, Chang Y, et al. Benign prostatic hyperplasia specific health status  
28 measures in clinical research: how much change in the American Urological Association symptom  
29 index and the benign prostatic hyperplasia impact index is perceptible to patients?. *J Urol*  
30 1995;154:1770-4.

31  
32 3 National Clinical Guideline Centre (NICE). Lower urinary tract symptoms in men: management  
33 (Clinical guideline CG97) 2015;CG97  
34 doi:<http://www.nice.org.uk/nicemedia/live/12984/48554/48554.pdf>.

35  
36 4 Gratzke C, Bachmann A, Descazeaud A, et al. EAU Guidelines on the Assessment of Non-  
37 neurogenic Male Lower Urinary Tract Symptoms including Benign Prostatic Obstruction. *Eur Urol*  
38 2015;67:1099-109 doi:10.1016/j.eururo.2014.12.038 [doi].

39  
40 5 Blanker MH, Klomp MA, van den Donk M, et al. Summary of the NHG practice guideline 'Lower  
41 urinary tract symptoms in men'. *Ned Tijdschr Geneesk* 2013;157:A6178.

42  
43 6 Coyne K, Revicki D, Hunt T, et al. Psychometric validation of an overactive bladder symptom and  
44 health-related quality of life questionnaire: the OAB-q. *Qual Life Res* 2002;11:563-74.

45  
46 7 Coyne KS, Matza LS, Thompson CL. The responsiveness of the Overactive Bladder Questionnaire  
47 (OAB-q). *Qual Life Res* 2005;14:849-55.

48  
49 8 Coyne KS, Thompson CL, Lai JS, et al. An overactive bladder symptom and health-related quality  
50 of life short-form: validation of the OAB-q SF. *Neurourol Urodyn* 2015;34:255-63  
51 doi:10.1002/nau.22559 [doi].

52  
53 9 Jaeschke R, Singer J, Guyatt GH. Measurement of health status. Ascertaining the minimal clinically  
54 important difference. *Control Clin Trials* 1989;10:407-15.

55  
56 10 Terwee CB, Roorda LD, Dekker J, et al. Mind the MIC: large variation among populations and  
57 methods. *J Clin Epidemiol* 2010;63:524-34 doi:10.1016/j.jclinepi.2009.08.010 [doi].  
58  
59  
60

- 1  
2  
3 11 Olsen MF, Bjerre E, Hansen MD, et al. Minimum clinically important differences in chronic pain  
4 vary considerably by baseline pain and methodological factors: systematic review of empirical  
5 studies. *J Clin Epidemiol* 2018;101:87,106.e2 doi:S0895-4356(18)30124-0 [pii].  
6  
7  
8 12 van der Worp H, Kollen BJ, Vermist T, et al. Symptom improvement and predictors associated  
9 with improvement after 6 weeks of alpha-blocker therapy: An exploratory, single-arm, open-label  
10 cohort study. *PLoS One* 2019;14:e0220417 doi:10.1371/journal.pone.0220417 [doi].  
11  
12 13 Viktrup L, Hayes RP, Wang P, et al. Construct validation of patient global impression of severity  
13 (PGI-S) and improvement (PGI-I) questionnaires in the treatment of men with lower urinary tract  
14 symptoms secondary to benign prostatic hyperplasia. *BMC Urol* 2012;12:30,2490-12-30  
15 doi:10.1186/1471-2490-12-30 [doi].  
16  
17 14 Barendrecht MM, Abrams P, Schumacher H, et al. Do alpha1-adrenoceptor antagonists improve  
18 lower urinary tract symptoms by reducing bladder outlet resistance?. *Neurourol Urodyn* 2008;27:226-  
19 30 doi:10.1002/nau.20481 [doi].  
20  
21 15 Yalcin I, Bump RC. Validation of two global impression questionnaires for incontinence. *Am J*  
22 *Obstet Gynecol* 2003;189:98-101.  
23  
24 16 Angst F, Aeschlimann A, Angst J. The minimal clinically important difference raised the  
25 significance of outcome effects above the statistical level, with methodological implications for future  
26 studies. *J Clin Epidemiol* 2017;82:128-36 doi:S0895-4356(16)30776-4 [pii].  
27  
28 17 Crosby RD, Kolotkin RL, Williams GR. Defining clinically meaningful change in health-related  
29 quality of life. *J Clin Epidemiol* 2003;56:395-407 doi:S0895435603000441 [pii].  
30  
31 18 Norman GR, Sloan JA, Wyrwich KW. Interpretation of changes in health-related quality of life:  
32 the remarkable universality of half a standard deviation. *Med Care* 2003;41:582-92  
33 doi:10.1097/01.MLR.0000062554.74615.4C [doi].  
34  
35 19 de Vet HC, Terwee CB. The minimal detectable change should not replace the minimal important  
36 difference. *J Clin Epidemiol* 2010;63:804,5; author reply 806 doi:10.1016/j.jclinepi.2009.12.015  
37 [doi].  
38  
39 20 Cella D, Hahn EA, Dineen K. Meaningful change in cancer-specific quality of life scores:  
40 differences between improvement and worsening. *Qual Life Res* 2002;11:207-21.  
41  
42 21 Guyatt GH, Norman GR, Juniper EF, et al. A critical look at transition ratings. *J Clin Epidemiol*  
43 2002;55:900-8 doi:S0895435602004353 [pii].  
44  
45 22 Guyatt GH, Jaeschke RJ. Reassessing quality-of-life instruments in the evaluation of new drugs.  
46 *Pharmacoeconomics* 1997;12:621-6 doi:10.2165/00019053-199712060-00002 [doi].  
47  
48 23 Wyrwich KW, Tierney WM, Wolinsky FD. Using the standard error of measurement to identify  
49 important changes on the Asthma Quality of Life Questionnaire. *Qual Life Res* 2002;11:1-7.  
50  
51 24 Devji T, Guyatt GH, Lytvyn L, et al. Application of minimal important differences in degenerative  
52 knee disease outcomes: a systematic review and case study to inform BMJ Rapid Recommendations.  
53 *BMJ Open* 2017;7:e015587,2016-015587 doi:10.1136/bmjopen-2016-015587 [doi].  
54  
55  
56  
57  
58  
59  
60

1  
2  
3 25 Revicki D, Hays RD, Cella D, et al. Recommended methods for determining responsiveness and  
4 minimally important differences for patient-reported outcomes. *J Clin Epidemiol* 2008;61:102-9  
5 doi:10.1016/j.jclinepi.2007.03.012 [doi].  
6

7 26 Alma H, de Jong C, Tsiligianni I, et al. Clinically relevant differences in COPD health status:  
8 systematic review and triangulation. *Eur Respir J* 2018;52:1800412 doi:10.1183/13993003.00412.  
9

10  
11  
12  
13  
14  
15  
16  
17  
18  
19  
20  
21  
22  
23  
24  
25  
26  
27  
28  
29  
30  
31  
32  
33  
34  
35  
36  
37  
38  
39  
40  
41  
42  
43  
44  
45  
46  
47  
48  
49  
50  
51  
52  
53  
54  
55  
56  
57  
58  
59  
60

For peer review only



**INTERNATIONAL-PROSTATE SYMPTOM SCORE (IPSS)**

|                                                                                                                                                                  | Not at all | Less than 1 time in 5 | Less than half the time | About half the time | More than half the time | Almost always   |
|------------------------------------------------------------------------------------------------------------------------------------------------------------------|------------|-----------------------|-------------------------|---------------------|-------------------------|-----------------|
| 1. Over the past 4 weeks, how often have you had a sensation of not emptying your bladder completely after you finished urinating?                               | 0          | 1                     | 2                       | 3                   | 4                       | 5               |
| 2. Over the past 4 weeks, how often have you had to urinate again less than two hours after you finished urinating?                                              | 0          | 1                     | 2                       | 3                   | 4                       | 5               |
| 3. Over the past 4 weeks, how often have you found you stopped and started again several times when you urinated?                                                | 0          | 1                     | 2                       | 3                   | 4                       | 5               |
| 4. Over the past 4 weeks, how often have you found it difficult to postpone urination?                                                                           | 0          | 1                     | 2                       | 3                   | 4                       | 5               |
| 5. Over the past 4 weeks, how often has your urinary stream been weaker than usual?                                                                              | 0          | 1                     | 2                       | 3                   | 4                       | 5               |
| 6. Over the past 4 weeks, how often have you had to push or strain to begin urination?                                                                           | 0          | 1                     | 2                       | 3                   | 4                       | 5               |
|                                                                                                                                                                  | None       | 1 time                | 2 times                 | 3 times             | 4 times                 | 5 or more times |
| 7. Over the past 4 weeks, how many times, in general, did you get up to urinate from the time you went to bed at night until the time you got up in the morning? | 0          | 1                     | 2                       | 3                   | 4                       | 5               |

**IPSS Quality of life question**

|                                                                                                                               | Delighted | Pleased | Mostly satisfied | Mixed - neither satisfied nor dissatisfied | Mostly dissatisfied | Unhappy | Terrible |
|-------------------------------------------------------------------------------------------------------------------------------|-----------|---------|------------------|--------------------------------------------|---------------------|---------|----------|
| If you were to spend the rest of your life with your urinary condition just the way it is now, how would you feel about that? | 0         | 1       | 2                | 3                                          | 4                   | 5       | 6        |

**OAB-q-SF**

This questionnaire asks about how much you have been bothered by selected bladder symptoms during the past 4 weeks. Please place a  or X in the box that best describes the extent to which you were bothered by each symptom during the past 4 weeks. There are no right or wrong answers. Please be sure to answer every question.

During the past 4 weeks, how bothered were you by...

|                                                           | Not at all               | A little bit             | Some-<br>what            | Quite a<br>bit           | A great<br>deal          | A very<br>great<br>deal  |
|-----------------------------------------------------------|--------------------------|--------------------------|--------------------------|--------------------------|--------------------------|--------------------------|
| 1. An uncomfortable urge to urinate?                      | <input type="checkbox"/> | <input type="checkbox"/> | <input type="checkbox"/> | <input type="checkbox"/> | <input type="checkbox"/> | <input type="checkbox"/> |
| 2. A sudden urge to urinate with little or no warning?    | <input type="checkbox"/> | <input type="checkbox"/> | <input type="checkbox"/> | <input type="checkbox"/> | <input type="checkbox"/> | <input type="checkbox"/> |
| 3. Accidental loss of small amounts of urine?             | <input type="checkbox"/> | <input type="checkbox"/> | <input type="checkbox"/> | <input type="checkbox"/> | <input type="checkbox"/> | <input type="checkbox"/> |
| 4. Nighttime urination?                                   | <input type="checkbox"/> | <input type="checkbox"/> | <input type="checkbox"/> | <input type="checkbox"/> | <input type="checkbox"/> | <input type="checkbox"/> |
| 5. Waking up at night because you had to urinate?         | <input type="checkbox"/> | <input type="checkbox"/> | <input type="checkbox"/> | <input type="checkbox"/> | <input type="checkbox"/> | <input type="checkbox"/> |
| 6. Urine loss associated with a strong desire to urinate? | <input type="checkbox"/> | <input type="checkbox"/> | <input type="checkbox"/> | <input type="checkbox"/> | <input type="checkbox"/> | <input type="checkbox"/> |

**Patient Global Impression of Improvement, PGI-I**

Have your symptoms changed since the start of the medication (the moment you completed the previous questionnaire)?

|                          |                          |                          |                          |                          |                          |                          |
|--------------------------|--------------------------|--------------------------|--------------------------|--------------------------|--------------------------|--------------------------|
| Very much better         | Much better              | A little better          | No change                | A little worse           | Much worse               | Very much worse          |
| <input type="checkbox"/> | <input type="checkbox"/> | <input type="checkbox"/> | <input type="checkbox"/> | <input type="checkbox"/> | <input type="checkbox"/> | <input type="checkbox"/> |

STROBE Statement—Checklist of items that should be included in reports of *cohort studies*

|                              | Item No | Recommendation                                                                                                                                                                                                                                                                                                         | Page No       |
|------------------------------|---------|------------------------------------------------------------------------------------------------------------------------------------------------------------------------------------------------------------------------------------------------------------------------------------------------------------------------|---------------|
| <b>Title and abstract</b>    | 1       | (a) Indicate the study's design with a commonly used term in the title or the abstract<br>(b) Provide in the abstract an informative and balanced summary of what was done and what was found                                                                                                                          | 2<br>2        |
| <b>Introduction</b>          |         |                                                                                                                                                                                                                                                                                                                        |               |
| Background/rationale         | 2       | Explain the scientific background and rationale for the investigation being reported                                                                                                                                                                                                                                   | 4             |
| Objectives                   | 3       | State specific objectives, including any prespecified hypotheses                                                                                                                                                                                                                                                       | 4             |
| <b>Methods</b>               |         |                                                                                                                                                                                                                                                                                                                        |               |
| Study design                 | 4       | Present key elements of study design early in the paper                                                                                                                                                                                                                                                                | 4-5           |
| Setting                      | 5       | Describe the setting, locations, and relevant dates, including periods of recruitment, exposure, follow-up, and data collection                                                                                                                                                                                        | 5             |
| Participants                 | 6       | (a) Give the eligibility criteria, and the sources and methods of selection of participants. Describe methods of follow-up<br>(b) For matched studies, give matching criteria and number of exposed and unexposed                                                                                                      | 5             |
| Variables                    | 7       | Clearly define all outcomes, exposures, predictors, potential confounders, and effect modifiers. Give diagnostic criteria, if applicable                                                                                                                                                                               | 5-6           |
| Data sources/<br>measurement | 8*      | For each variable of interest, give sources of data and details of methods of assessment (measurement). Describe comparability of assessment methods if there is more than one group                                                                                                                                   | 5-6           |
| Bias                         | 9       | Describe any efforts to address potential sources of bias                                                                                                                                                                                                                                                              | 7             |
| Study size                   | 10      | Explain how the study size was arrived at                                                                                                                                                                                                                                                                              | -             |
| Quantitative variables       | 11      | Explain how quantitative variables were handled in the analyses. If applicable, describe which groupings were chosen and why                                                                                                                                                                                           | 6             |
| Statistical methods          | 12      | (a) Describe all statistical methods, including those used to control for confounding<br>(b) Describe any methods used to examine subgroups and interactions<br>(c) Explain how missing data were addressed<br>(d) If applicable, explain how loss to follow-up was addressed<br>(e) Describe any sensitivity analyses | 6-7<br>6<br>7 |
| <b>Results</b>               |         |                                                                                                                                                                                                                                                                                                                        |               |
| Participants                 | 13*     | (a) Report numbers of individuals at each stage of study—eg numbers potentially eligible, examined for eligibility, confirmed eligible, included in the study, completing follow-up, and analysed<br>(b) Give reasons for non-participation at each stage<br>(c) Consider use of a flow diagram                        | 7             |
| Descriptive data             | 14*     | (a) Give characteristics of study participants (eg demographic, clinical, social) and information on exposures and potential confounders<br>(b) Indicate number of participants with missing data for each variable of interest<br>(c) Summarise follow-up time (eg, average and total amount)                         | 8<br>8<br>8   |
| Outcome data                 | 15*     | Report numbers of outcome events or summary measures over time                                                                                                                                                                                                                                                         | -             |

|    |                          |    |                                                                                                                                                                                                              |       |
|----|--------------------------|----|--------------------------------------------------------------------------------------------------------------------------------------------------------------------------------------------------------------|-------|
| 1  | Main results             | 16 | (a) Give unadjusted estimates and, if applicable, confounder-adjusted estimates and their precision (eg, 95% confidence interval). Make clear which confounders were adjusted for and why they were included | 7-11  |
| 2  |                          |    | (b) Report category boundaries when continuous variables were categorized                                                                                                                                    | 7-11  |
| 3  |                          |    | (c) If relevant, consider translating estimates of relative risk into absolute risk for a meaningful time period                                                                                             |       |
| 4  |                          |    |                                                                                                                                                                                                              |       |
| 5  |                          |    |                                                                                                                                                                                                              |       |
| 6  |                          |    |                                                                                                                                                                                                              |       |
| 7  |                          |    |                                                                                                                                                                                                              |       |
| 8  |                          |    |                                                                                                                                                                                                              |       |
| 9  | Other analyses           | 17 | Report other analyses done—eg analyses of subgroups and interactions, and sensitivity analyses                                                                                                               | 7-11  |
| 10 |                          |    |                                                                                                                                                                                                              |       |
| 11 | <b>Discussion</b>        |    |                                                                                                                                                                                                              |       |
| 12 |                          |    |                                                                                                                                                                                                              |       |
| 13 | Key results              | 18 | Summarise key results with reference to study objectives                                                                                                                                                     | 11    |
| 14 | Limitations              | 19 | Discuss limitations of the study, taking into account sources of potential bias or imprecision. Discuss both direction and magnitude of any potential bias                                                   | 13-14 |
| 15 |                          |    |                                                                                                                                                                                                              |       |
| 16 | Interpretation           | 20 | Give a cautious overall interpretation of results considering objectives, limitations, multiplicity of analyses, results from similar studies, and other relevant evidence                                   | 11-14 |
| 17 |                          |    |                                                                                                                                                                                                              |       |
| 18 |                          |    |                                                                                                                                                                                                              |       |
| 19 | Generalisability         | 21 | Discuss the generalisability (external validity) of the study results                                                                                                                                        | 11    |
| 20 |                          |    |                                                                                                                                                                                                              |       |
| 21 | <b>Other information</b> |    |                                                                                                                                                                                                              |       |
| 22 | Funding                  | 22 | Give the source of funding and the role of the funders for the present study and, if applicable, for the original study on which the present article is based                                                | 3     |
| 23 |                          |    |                                                                                                                                                                                                              |       |
| 24 |                          |    |                                                                                                                                                                                                              |       |

\*Give information separately for exposed and unexposed groups.

**Note:** An Explanation and Elaboration article discusses each checklist item and gives methodological background and published examples of transparent reporting. The STROBE checklist is best used in conjunction with this article (freely available on the Web sites of PLoS Medicine at <http://www.plosmedicine.org/>, Annals of Internal Medicine at <http://www.annals.org/>, and Epidemiology at <http://www.epidem.com/>). Information on the STROBE Initiative is available at <http://www.strobe-statement.org>.
