# Supplementary material for: Determining the minimal important differences in the International Prostate Symptom Score and Overactive Bladder Questionnaire: results from an observational cohort study in Dutch primary care
Source: PubMed Central journal article supplement (PMC7008409; doi:10.1136/bmjopen-2019-032795), 2019-12-23
Supplement: bmjopen-2019-032795supp001.pdf [file bmjopen-2019-032795supp001.pdf]

**INTERNATIONAL-PROSTATE SYMPTOM SCORE (IPSS)**

|                                                                                                                                                                  | Not at all | Less than 1 time in 5 | Less than half the time | About half the time | More than half the time | Almost always   |
|------------------------------------------------------------------------------------------------------------------------------------------------------------------|------------|-----------------------|-------------------------|---------------------|-------------------------|-----------------|
| 1. Over the past 4 weeks, how often have you had a sensation of not emptying your bladder completely after you finished urinating?                               | 0          | 1                     | 2                       | 3                   | 4                       | 5               |
| 2. Over the past 4 weeks, how often have you had to urinate again less than two hours after you finished urinating?                                              | 0          | 1                     | 2                       | 3                   | 4                       | 5               |
| 3. Over the past 4 weeks, how often have you found you stopped and started again several times when you urinated?                                                | 0          | 1                     | 2                       | 3                   | 4                       | 5               |
| 4. Over the past 4 weeks, how often have you found it difficult to postpone urination?                                                                           | 0          | 1                     | 2                       | 3                   | 4                       | 5               |
| 5. Over the past 4 weeks, how often has your urinary stream been weaker than usual?                                                                              | 0          | 1                     | 2                       | 3                   | 4                       | 5               |
| 6. Over the past 4 weeks, how often have you had to push or strain to begin urination?                                                                           | 0          | 1                     | 2                       | 3                   | 4                       | 5               |
|                                                                                                                                                                  | None       | 1 time                | 2 times                 | 3 times             | 4 times                 | 5 or more times |
| 7. Over the past 4 weeks, how many times, in general, did you get up to urinate from the time you went to bed at night until the time you got up in the morning? | 0          | 1                     | 2                       | 3                   | 4                       | 5               |

**IPSS Quality of life question**

|                                                                                                                               | Delighted | Pleased | Mostly satisfied | Mixed - neither satisfied nor dissatisfied | Mostly dissatisfied | Unhappy | Terrible |
|-------------------------------------------------------------------------------------------------------------------------------|-----------|---------|------------------|--------------------------------------------|---------------------|---------|----------|
| If you were to spend the rest of your life with your urinary condition just the way it is now, how would you feel about that? | 0         | 1       | 2                | 3                                          | 4                   | 5       | 6        |

**OAB-q-SF**

This questionnaire asks about how much you have been bothered by selected bladder symptoms during the past 4 weeks. Please place a dot or X in the box that best describes the extent to which you were bothered by each symptom during the past 4 weeks. There are no right or wrong answers. Please be sure to answer every question.

During the past 4 weeks, how bothered were you by...

|                                                           | Not at all               | A little bit             | Some-<br>what            | Quite a<br>bit           | A great<br>deal          | A very<br>great<br>deal  |
|-----------------------------------------------------------|--------------------------|--------------------------|--------------------------|--------------------------|--------------------------|--------------------------|
| 1. An uncomfortable urge to urinate?                      | <input type="checkbox"/> | <input type="checkbox"/> | <input type="checkbox"/> | <input type="checkbox"/> | <input type="checkbox"/> | <input type="checkbox"/> |
| 2. A sudden urge to urinate with little or no warning?    | <input type="checkbox"/> | <input type="checkbox"/> | <input type="checkbox"/> | <input type="checkbox"/> | <input type="checkbox"/> | <input type="checkbox"/> |
| 3. Accidental loss of small amounts of urine?             | <input type="checkbox"/> | <input type="checkbox"/> | <input type="checkbox"/> | <input type="checkbox"/> | <input type="checkbox"/> | <input type="checkbox"/> |
| 4. Nighttime urination?                                   | <input type="checkbox"/> | <input type="checkbox"/> | <input type="checkbox"/> | <input type="checkbox"/> | <input type="checkbox"/> | <input type="checkbox"/> |
| 5. Waking up at night because you had to urinate?         | <input type="checkbox"/> | <input type="checkbox"/> | <input type="checkbox"/> | <input type="checkbox"/> | <input type="checkbox"/> | <input type="checkbox"/> |
| 6. Urine loss associated with a strong desire to urinate? | <input type="checkbox"/> | <input type="checkbox"/> | <input type="checkbox"/> | <input type="checkbox"/> | <input type="checkbox"/> | <input type="checkbox"/> |

**Patient Global Impression of Improvement, PGI-I**

Have your symptoms changed since the start of the medication (the moment you completed the previous questionnaire)?

|                          |                          |                          |                          |                          |                          |                          |
|--------------------------|--------------------------|--------------------------|--------------------------|--------------------------|--------------------------|--------------------------|
| Very much<br>better      | Much<br>better           | A little better          | No change                | A little<br>worse        | Much<br>worse            | Very much<br>worse       |
| <input type="checkbox"/> | <input type="checkbox"/> | <input type="checkbox"/> | <input type="checkbox"/> | <input type="checkbox"/> | <input type="checkbox"/> | <input type="checkbox"/> |
